# Supplementary material for: Fluorine–thiophene-substituted organic dyes for dye sensitized solar cells
Source: Royal Society of Chemistry journal article supplement (doi:10.1039/c3ta10423k), 2013-01-01

## Supporting Information

### Fluorine Substituted Organic Dyes For Efficient Dye Sensitized Solar Cells

*Angela Scrascia,<sup>a</sup> Luisa De Marco,<sup>b</sup> Savio Laricchia,<sup>b</sup> Rosaria Anna Picca,<sup>c</sup> Claudia Carlucci,<sup>a,d</sup> Eduardo Fabiano,<sup>a</sup> Agostina Lina Capodilupo,<sup>a</sup> Fabio Della Sala,<sup>a,b</sup> Giuseppe Gigli,<sup>a,b,d</sup> and Giuseppe Ciccarella<sup>a,d\*</sup>*

a Istituto Nanoscienze – CNR, National Nanotechnology Laboratory (NNL), Via Arnesano, 73100 Lecce, Italy. E-mail: giuseppe.ciccarella@unisalento.it

b Center for Biomolecular Nanotechnologies @UNILE, Istituto Italiano di Tecnologia (IIT), Via Barsanti, 73010 Arnesano (LE), Italy

c Dipartimento di Scienza dei Materiali, Università del Salento, via Monteroni 73100 Lecce, Italy.

d Dipartimento di Ingegneria dell'Innovazione, Università del Salento, Via Monteroni, 73100, Lecce, Italy.

#### Contents

**1. Absorption Spectra. Fig. S1-7 Absorption spectra of the dyes AS1-7 in different solvents and absorption spectra of dyes recorded in CHCl<sub>3</sub>, recorded in CHCl<sub>3</sub> in the presence of triethylamine (TEA) and recorded in CHCl<sub>3</sub> in the presence of trifluoroacetic acid (TFA). Table S1. Absorption spectra data for the Dyes before and after the addition of Trifluoroacetic Acid (TFA) and Triethylamine (TEA).**

**Emission Spectra Fig. S8 of the dyes AS1-7.**

**2. Table S2. Electronic transitions.**

**3. Fabrication of DSSCs and photovoltaic measurements**

**4. NMR Spectra compounds 1a-c, 2a-c, 5-11, AS1-7**

## 1. Absorption Spectra

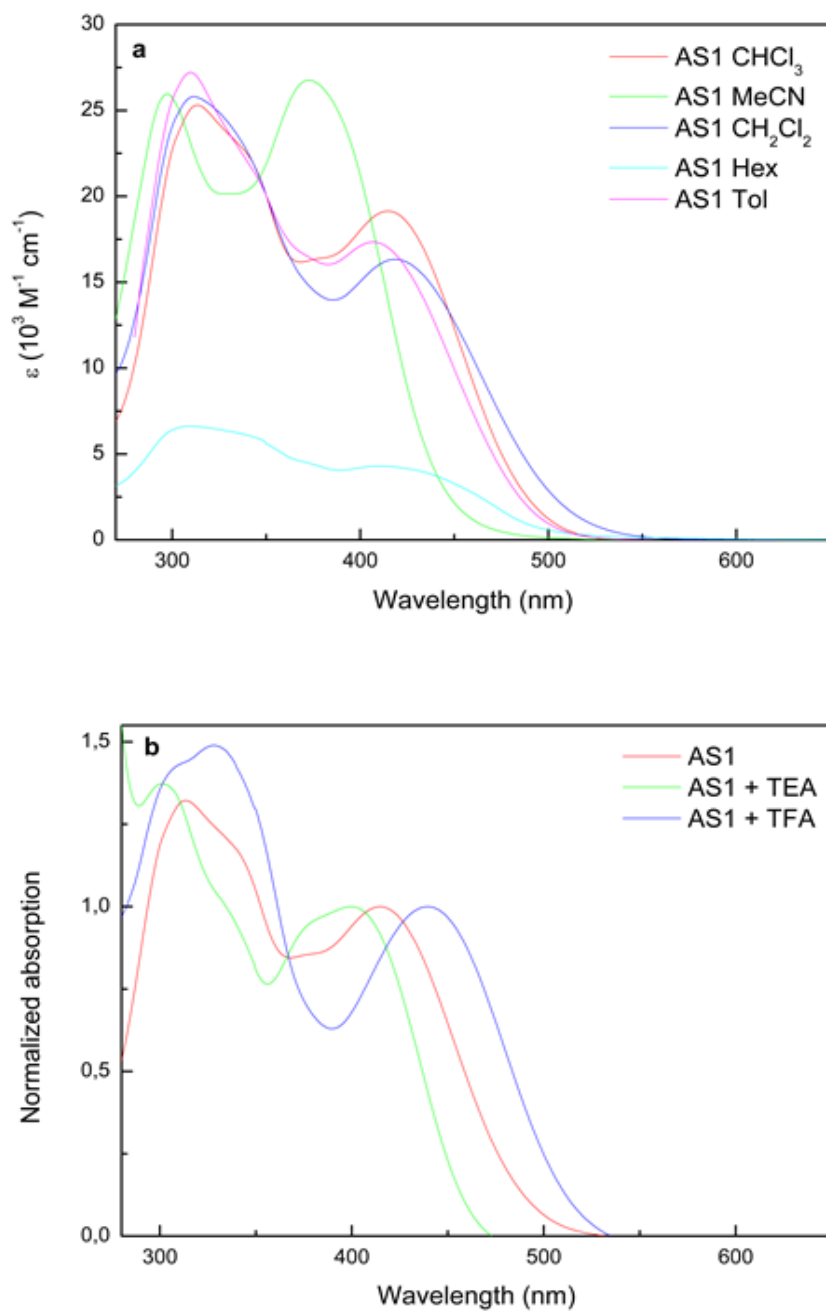

**Fig. S1** Absorption spectra of the dyes **AS1** in different solvents ( $3 \times 10^{-5} \text{ M}$ ) (a), absorption spectra of the dyes **AS1** in  $\text{CHCl}_3$  ( $3 \times 10^{-5} \text{ M}$ ) before (red line) and after the addition of Triethylamine (TEA) (green line) and of Trifluoroacetic Acid (TFA) (blue line) (b).

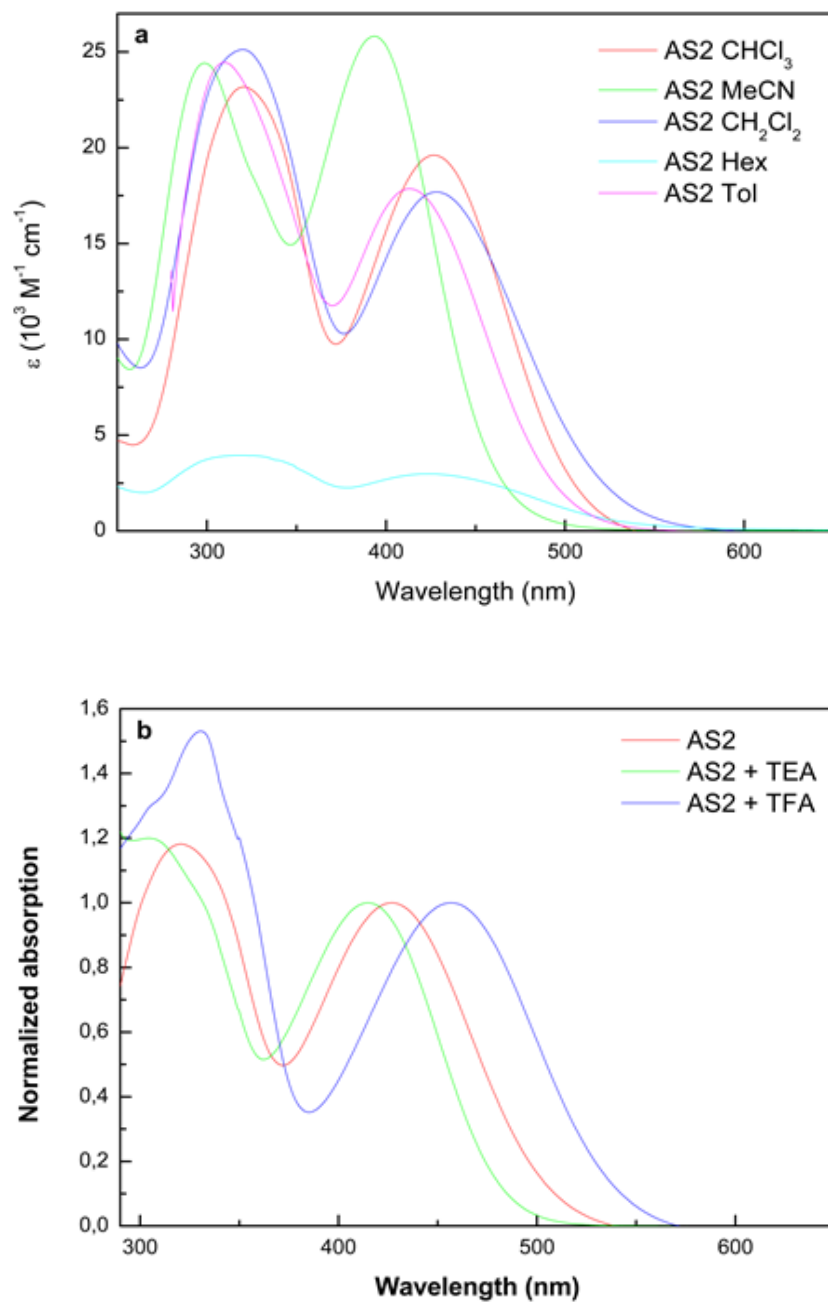

**Fig. S2** Absorption spectra of the dyes **AS2** in different solvents ( $3 \times 10^{-5} \text{ M}$ ) (a), absorption spectra of the dyes **AS2** in  $\text{CHCl}_3$  ( $3 \times 10^{-5} \text{ M}$ ) before (red line) and after the addition of Triethylamine (TEA) (green line) and of Trifluoroacetic Acid (TFA) (blue line) (b).

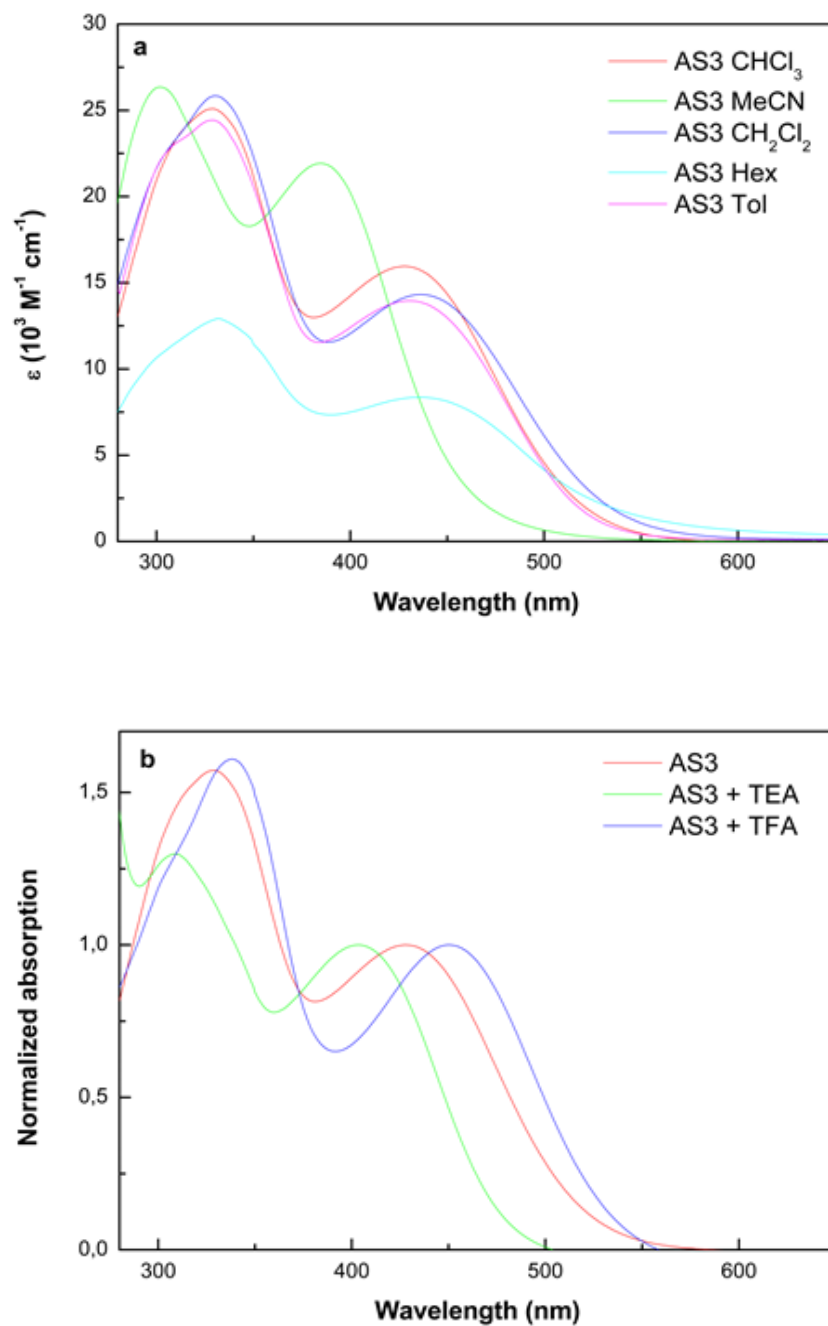

**Fig. S3** Absorption spectra of the dyes **AS3** in different solvents ( $3 \times 10^{-5} \text{ M}$ ) (a), absorption spectra of the dyes **AS3** in  $\text{CHCl}_3$  ( $3 \times 10^{-5} \text{ M}$ ) before (red line) and after the addition of Triethylamine (TEA) (green line) and of Trifluoroacetic Acid (TFA) (blue line) (b).

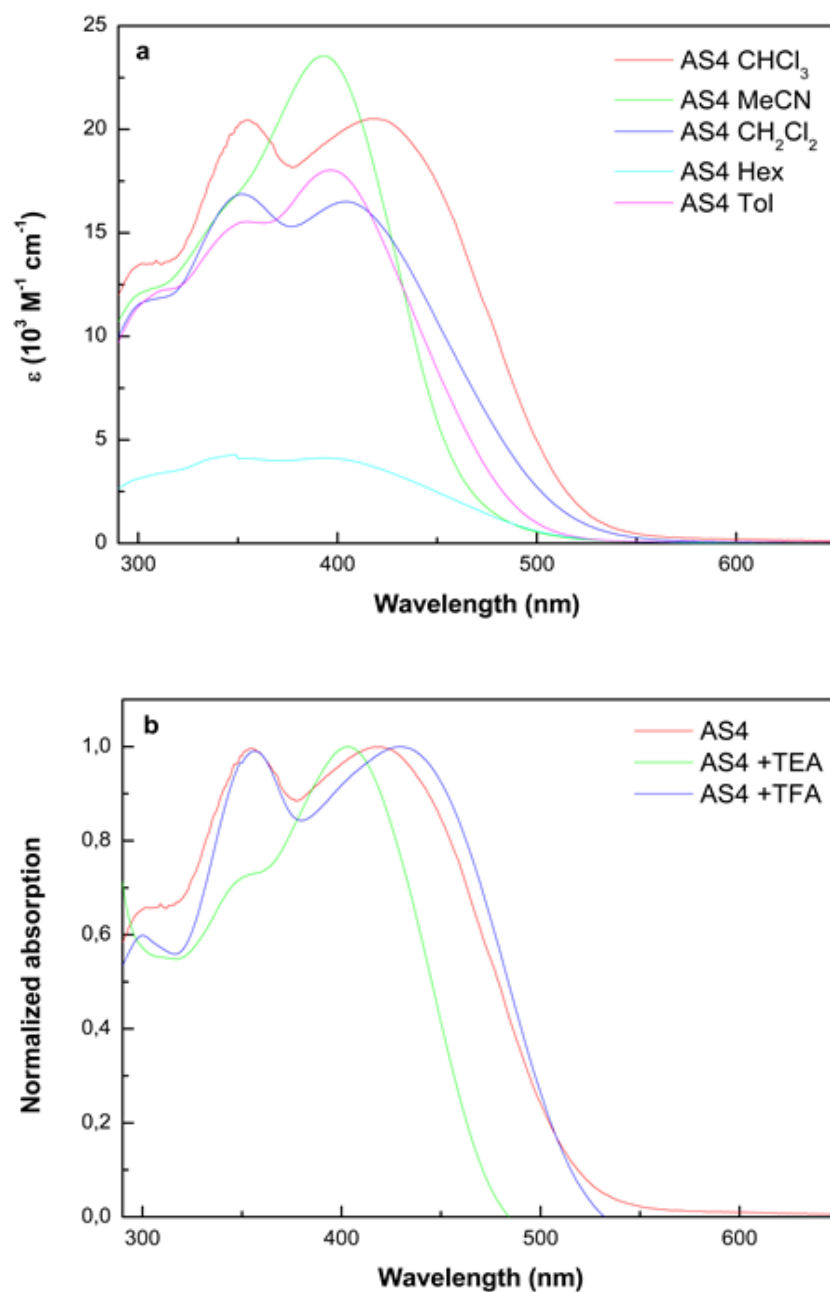

**Fig. S4** Absorption spectra of the dyes **AS4** in different solvents ( $3 \times 10^{-5} \text{ M}$ ) (a), absorption spectra of the dyes **AS4** in  $\text{CHCl}_3$  ( $3 \times 10^{-5} \text{ M}$ ) before (red line) and after the addition of Triethylamine (TEA) (green line) and of Trifluoroacetic Acid (TFA) (blue line) (b).

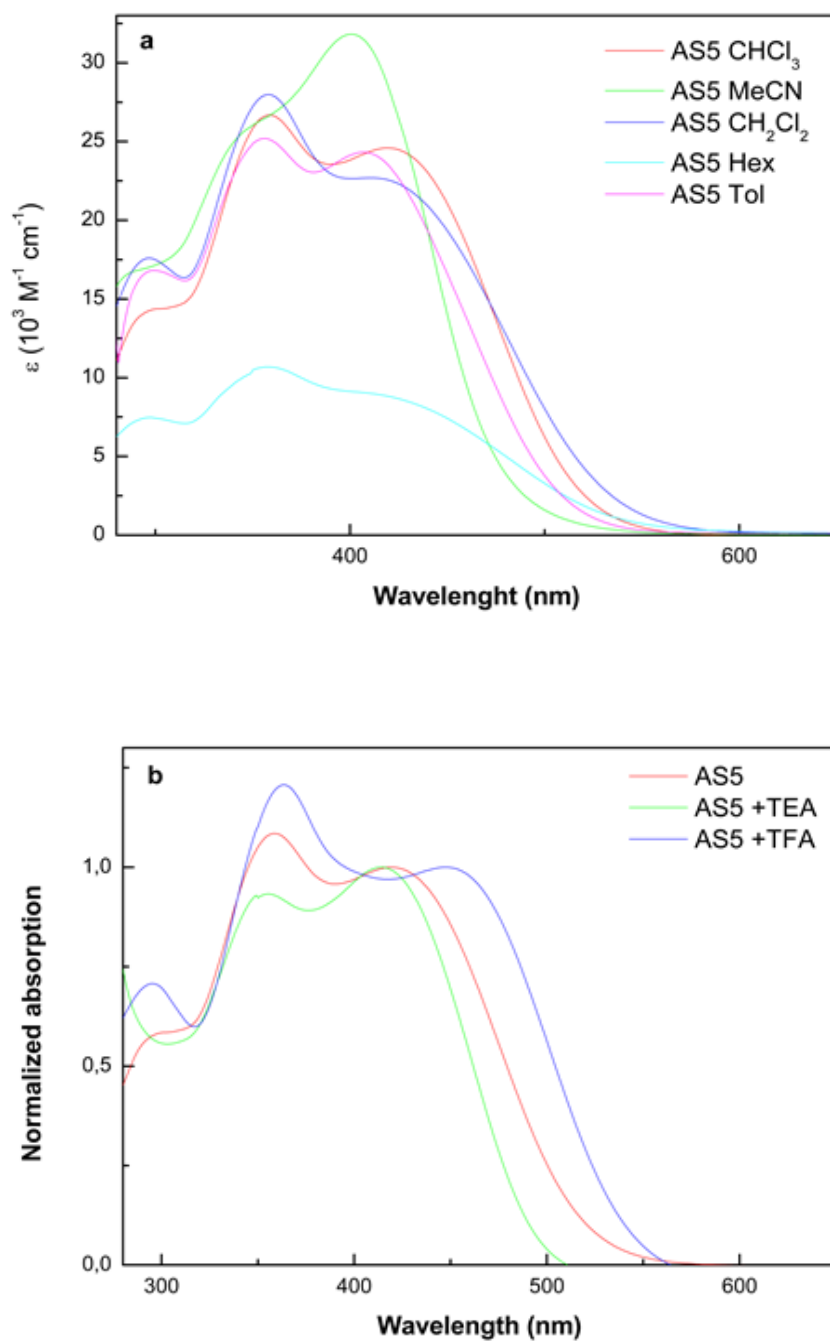

**Fig. S5** Absorption spectra of the dyes **AS5** in different solvents ( $3 \times 10^{-5} \text{ M}$ ) (a), absorption spectra of the dyes **AS5** in  $\text{CHCl}_3$  ( $3 \times 10^{-5} \text{ M}$ ) before (red line) and after the addition of Triethylamine (TEA) (green line) and of Trifluoroacetic Acid (TFA) (blue line) (b).

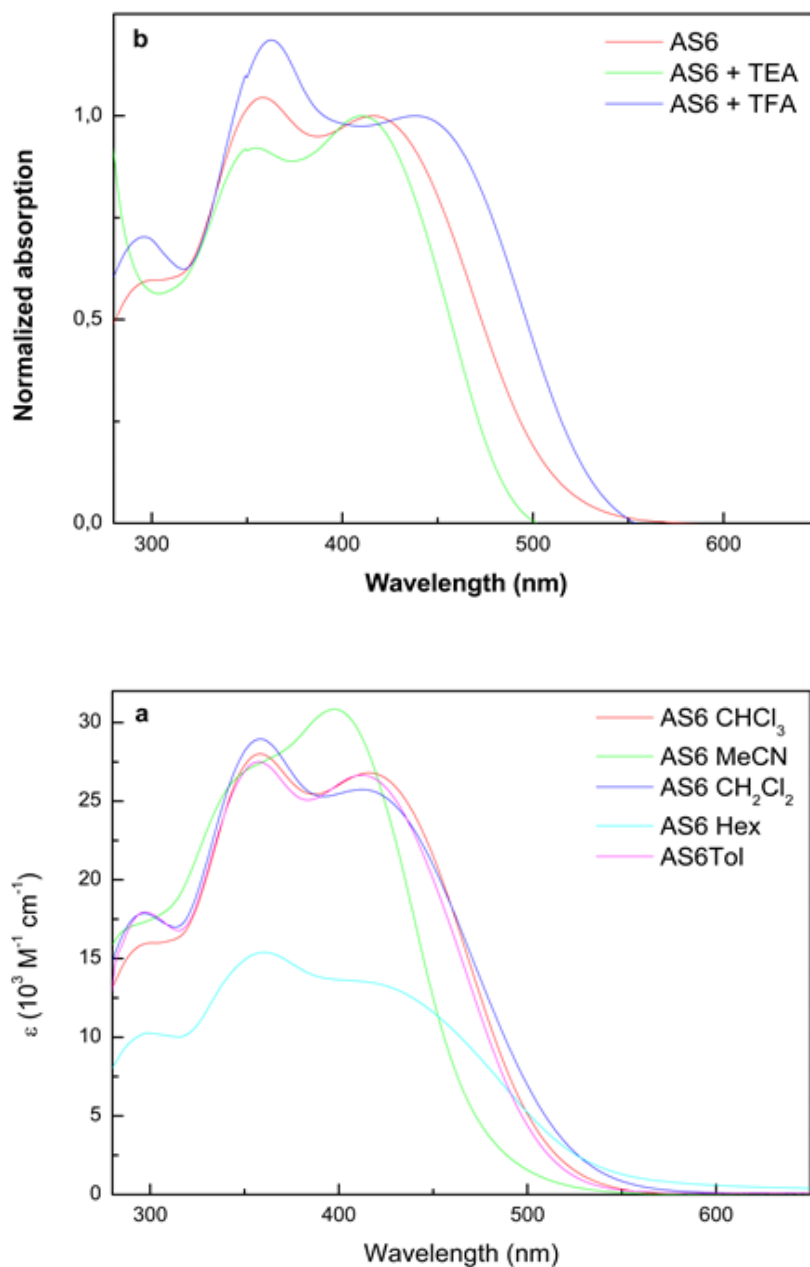

**Fig. S6** Absorption spectra of the dyes **AS6** in different solvents ( $3 \times 10^{-5} \text{ M}$ ) (a), absorption spectra of the dyes **AS6** in  $\text{CHCl}_3$  ( $3 \times 10^{-5} \text{ M}$ ) before (red line) and after the addition of Triethylamine (TEA) (green line) and of Trifluoroacetic Acid (TFA) (blue line) (b).

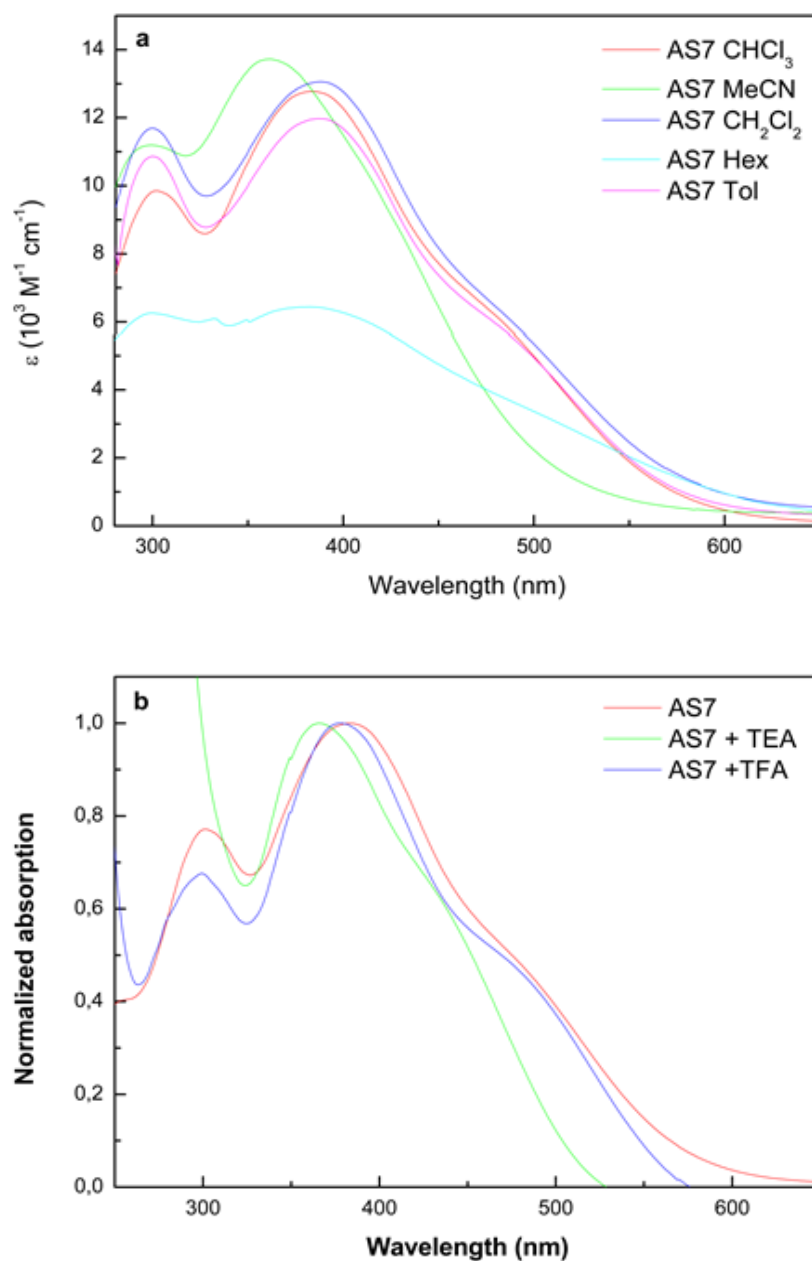

**Fig. S7** Absorption spectra of the dyes **AS7** in different solvents ( $3 \times 10^{-5} \text{ M}$ ) (a), absorption spectra of the dyes **AS7** in  $\text{CHCl}_3$  ( $3 \times 10^{-5} \text{ M}$ ) before (red line) and after the addition of Triethylamine (TEA) (green line) and of Trifluoroacetic Acid (TFA) (blue line) (b).



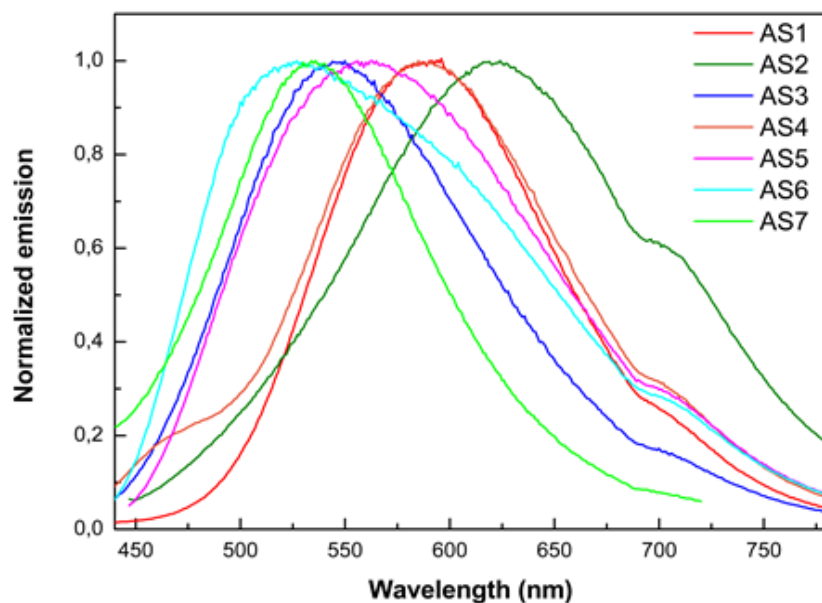

**Fig. S8** Normalized Emission Spectra of the dyes **AS1-7** in different  $\text{CHCl}_3$ .

**Table S1.** Absorption spectra for the Dyes before and after the addition of Trifluoroacetic Acid (TFA) and Triethylamine (TEA) and emission data.

| Dye        | $\lambda_{\text{max}}/\text{nm}^{\text{a}}$ | $\epsilon/\text{M}^{-1}\text{cm}^{-1}^{\text{a}}$ | $\lambda_{\text{max}}/\text{nm}^{\text{b}}$ | $\lambda_{\text{max}}/\text{nm}^{\text{c}}$ | $\lambda_{\text{em}}/\text{nm}^{\text{a}}$ |
|------------|---------------------------------------------|---------------------------------------------------|---------------------------------------------|---------------------------------------------|--------------------------------------------|
| <b>AS1</b> | 415 (313)                                   | 19143 (25300)                                     | 399                                         | 440                                         | 591                                        |
| <b>AS2</b> | 427 (321)                                   | 19614 (23180)                                     | 415                                         | 457                                         | 624                                        |
| <b>AS6</b> | 428 (329)                                   | 15958 (25100)                                     | 403                                         | 451                                         | 550                                        |
| <b>AS4</b> | 417 (355)                                   | 20529 (20460)                                     | 403                                         | 429                                         | 585                                        |
| <b>AS5</b> | 419 (358)                                   | 24529 (26675)                                     | 414                                         | 448                                         | 563                                        |
| <b>AS6</b> | 416 (358)                                   | 26798 (28009)                                     | 410                                         | 438                                         | 527                                        |
| <b>AS7</b> | 383 (383)                                   | 12776 (9855)                                      | 366                                         | 379                                         | 534                                        |

<sup>a</sup>Recorded in  $\text{CHCl}_3$ . <sup>b</sup>Recorded in  $\text{CHCl}_3$  in the presence of triethylamine. <sup>c</sup>Recorded in  $\text{CHCl}_3$  in the presence of trifluoroacetic acid.

## 2. Computational Characterization

**Table S2.** Calculated details of electronic transitions with the relative oscillator strengths  $f_{\text{osc}}$  obtained by performing for the **AS1** dye, in gas phase, different TD-DFT and RI-CC2 calculations.

| XC functional | Single excited state               | $\lambda$ (nm) | $f_{\text{osc}}$        |
|---------------|------------------------------------|----------------|-------------------------|
| BLYP          | HOMO $\rightarrow$ LUMO (94.7%)    | 712.2448       | 0.5684                  |
|               | HOMO -1 $\rightarrow$ LUMO (70.5%) | 433.6638       | 1.0275                  |
|               | HOMO $\rightarrow$ LUMO +1 (14.8%) |                |                         |
|               | HOMO -2 $\rightarrow$ LUMO (48.7%) | 401.1962       | 0.1832                  |
|               | HOMO $\rightarrow$ LUMO +1 (43.9%) |                |                         |
| B3LYP         | HOMO $\rightarrow$ LUMO (99.3%)    | 534.6866       | 0.8945                  |
|               | HOMO -1 $\rightarrow$ LUMO (84.7%) | 369.3075       | 1.0081                  |
|               | HOMO $\rightarrow$ LUMO +1 (13.8%) |                |                         |
|               | HOMO $\rightarrow$ LUMO +2 (93.8%) | 337.7298       | $0.1182 \times 10^{-1}$ |
| BHLYP         | HOMO $\rightarrow$ LUMO (81.8%)    | 399.5729       | 1.6984                  |
|               | HOMO -1 $\rightarrow$ LUMO (76.0%) | 299.7153       | 0.2341                  |
|               | HOMO $\rightarrow$ LUMO +2 (85.1%) | 285.9950       | $0.1826 \times 10^{-1}$ |
| RI-CC2        | HOMO $\rightarrow$ LUMO (88.2%)    | 425.7028       | -                       |
|               | HOMO $\rightarrow$ LUMO +9 (43.8%) | 320.0973       | -                       |
|               | HOMO -1 $\rightarrow$ LUMO (53.4%) | 310.6229       | -                       |

### 3. Fabrication of DSSCs and photovoltaic measurements

DSSC devices were prepared according to the reported literature<sup>64-66</sup> as follows: fluorine-doped tin oxide (FTO, 10 ohm/sq., provided by Solaronix S.A.) glass plates were first cleaned in a detergent solution using an ultrasonic bath for 15 min, and then rinsed with water and ethanol. Double-layer photoanodes (thickness 13  $\mu\text{m}$ ) were prepared as follows: a layer of Dyesol 18NR-T paste was deposited onto FTO glass and dried at 125°C for 15 min to obtain a transparent nanocrystalline film of thickness around 8  $\mu\text{m}$ ; a scattering layer, 5  $\mu\text{m}$ , made by Dyesol 18-NR-AO colloidal paste was coated onto the transparent layer and the sintering process at 500°C for 30 min was performed. The active area of photoanodes was 0.16  $\text{cm}^2$ . The electrodes coated with the  $\text{TiO}_2$  pastes were gradually heated under an air flow and sintered at 450 °C for 30 min. The substrate temperature was then allowed to slowly decrease. Once cooled down at about 80°C, the electrodes were immersed into 0.2 mM solutions of dyes **AS1**, **AS2**, **AS3** and **AS4** in AcCN with 3mM chenodeoxycholic acid and kept for 12 h in dark at room temperature. The reference photoanodes were prepared by dyeing into a solution 0.2 mM of (bis(tetrabutylammonium)-cis-di(thiocyanato)-N,N'-bis (4 - carboxylato - 4' - carboxylic acid-2, 2 -bipyridine) ruthenium(II) (N719, provided by Solaronix S.A.) in a mixture of acetonitrile and tert-butyl alcohol (v/v, 1:1) at room temperature for 14 h. The counter electrodes were prepared by sputtering a 50 nm Pt layer on a hole drilled cleaned FTO plate. The two plates were faced and assembled by means of a gasket of 50 $\mu\text{m}$ -thick Surlyn® foil (Dyesol Ltd) interposed between them. The redox electrolyte (0.1 M LiI, 0.05 M  $\text{I}_2$ , 0.6 M 1-methyl-3-propylimidazolium iodide, and 0.5 M tert-butylpyridine in dry acetonitrile) was vacuum-injected into the space between the electrodes. Photocurrent-voltage I-V measurements were performed using a Keithley unit (Model 2400 Source Meter). A Newport AM 1.5 Solar Simulator (Model 91160A equipped with a 300W Xenon Arc Lamp) serving as a light source. The light intensity (or radiant power) was calibrated to 100  $\text{mW}/\text{cm}^2$  using as reference a Si solar cell. The incident photon-to-current conversion efficiency (IPCE) was measurement by a DC method. IPCE measurements were carried out with a computerized setup consisting of a xenon arc lamp (140 W, Newport, 67005) coupled to a monochromator (Cornerstone 260 Oriel 74125). Light intensity was measured by a calibrated UV silicon photodetector (Oriel 71675) and the short circuit currents of the DSSCs were measured by using an optical power/energy meter, dual channel (Newport 2936-C).

## 4. NMR Spectra

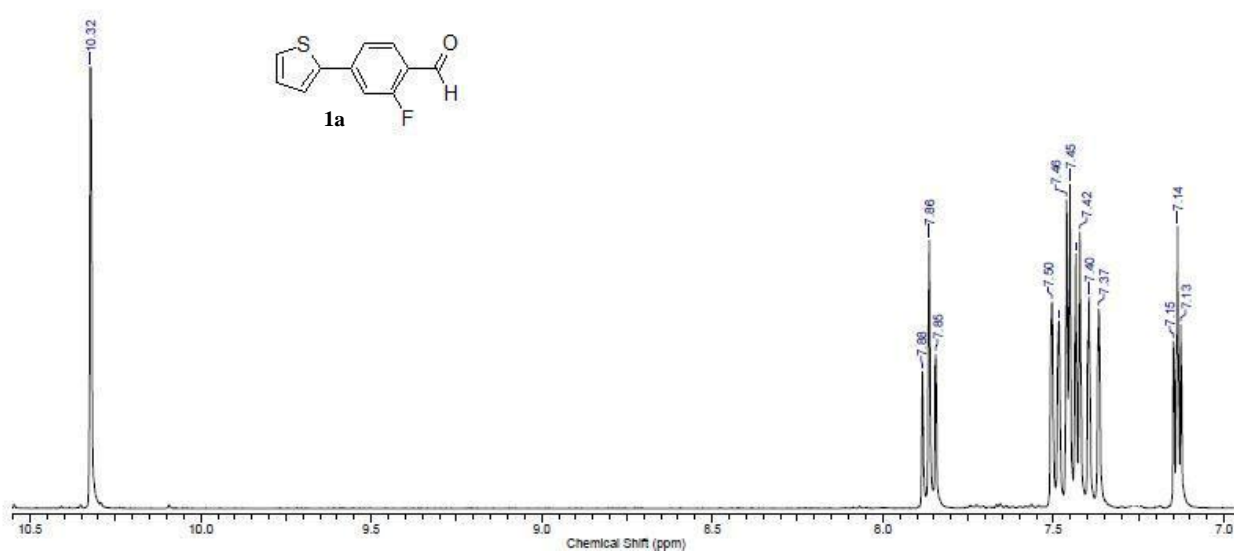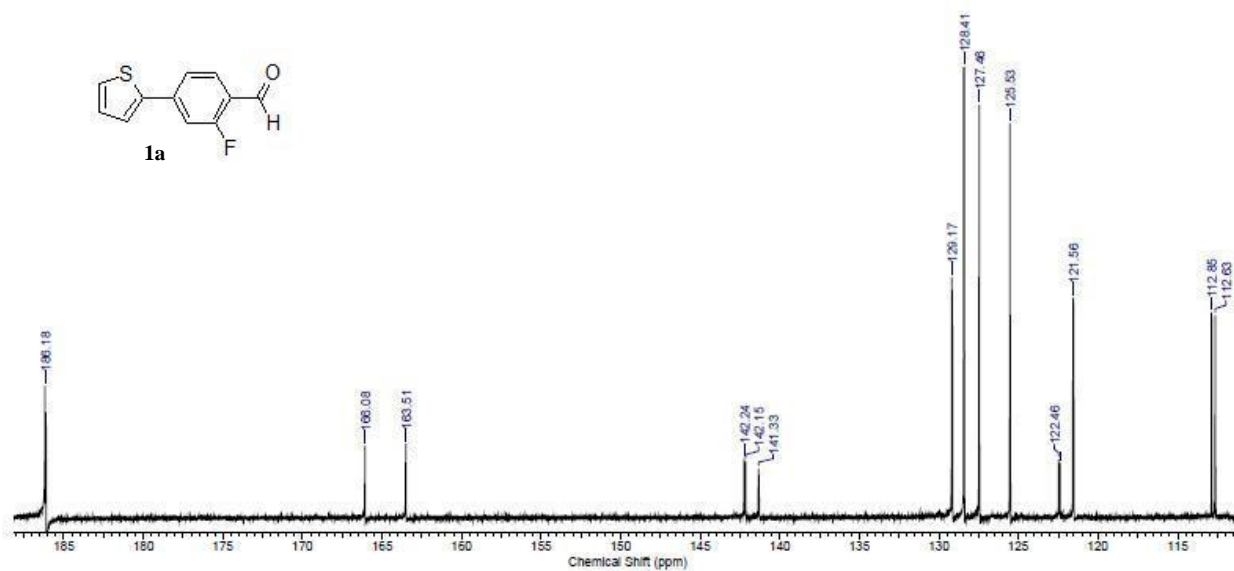

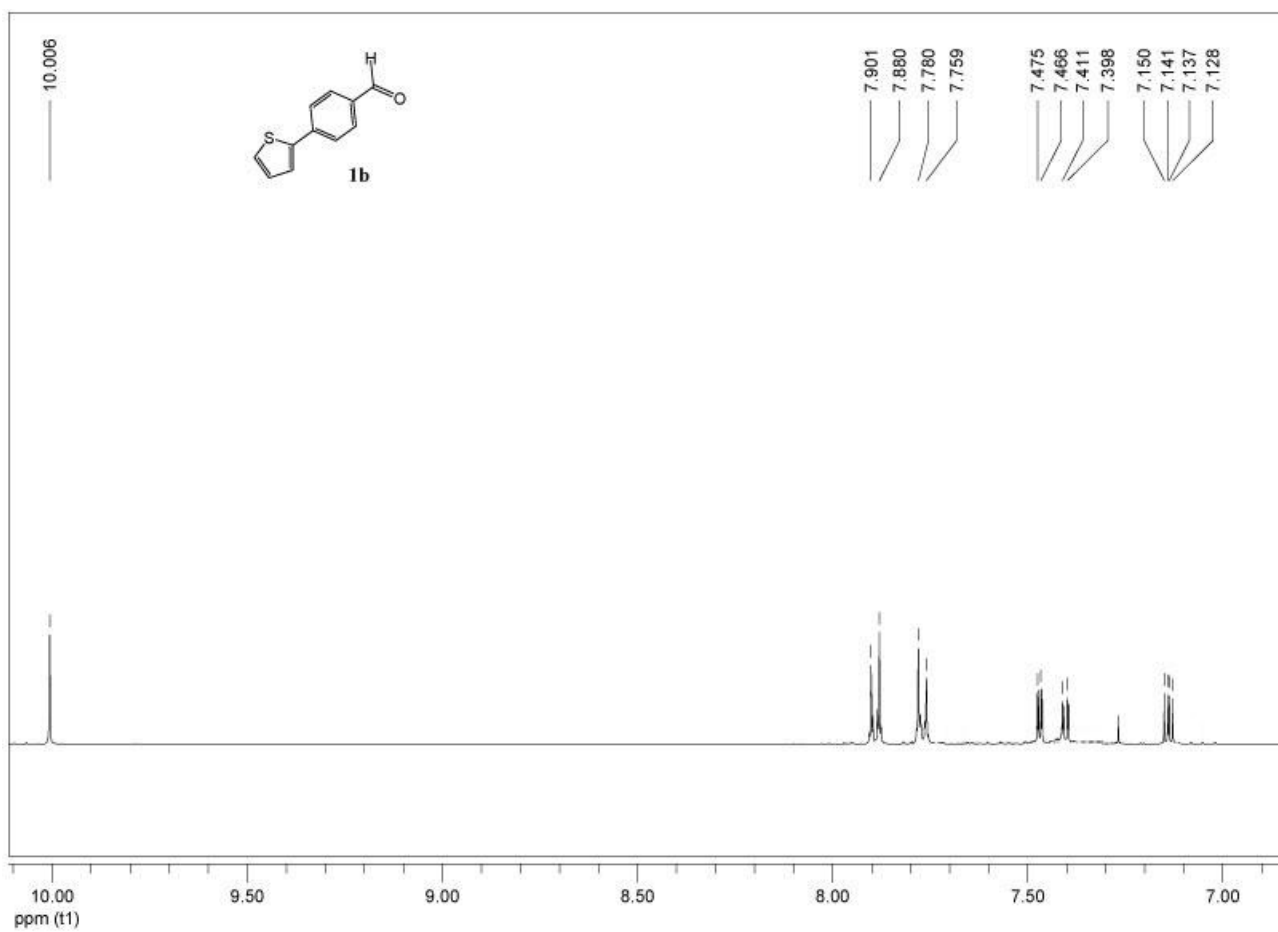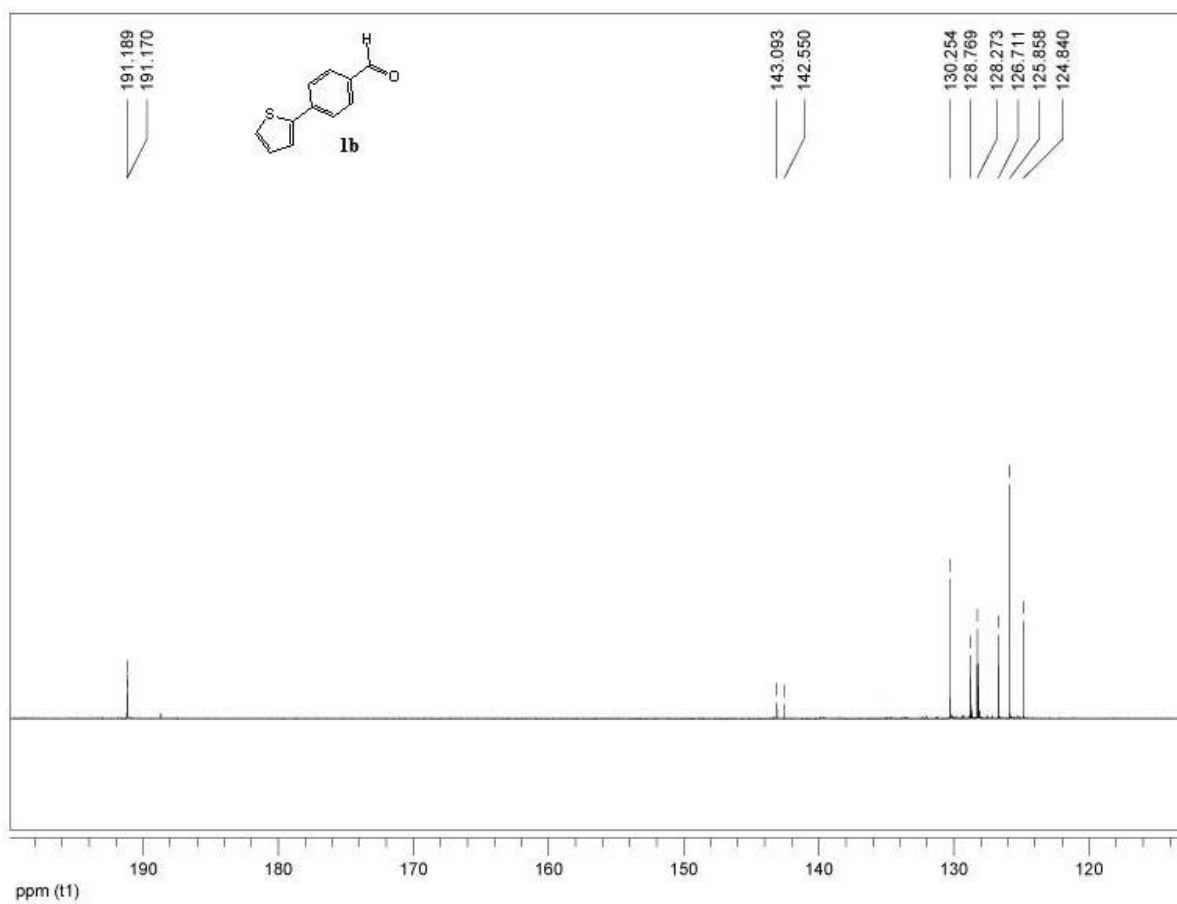

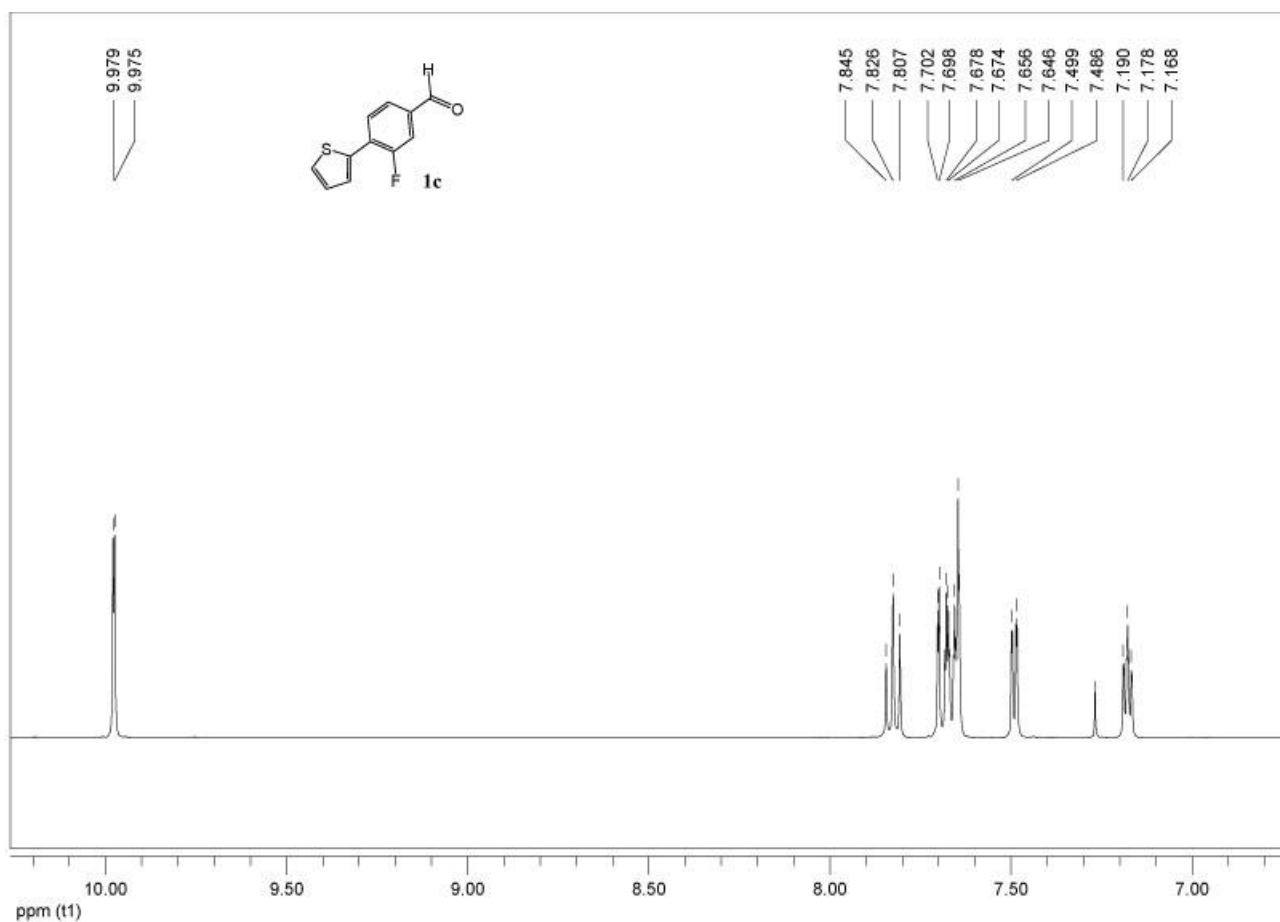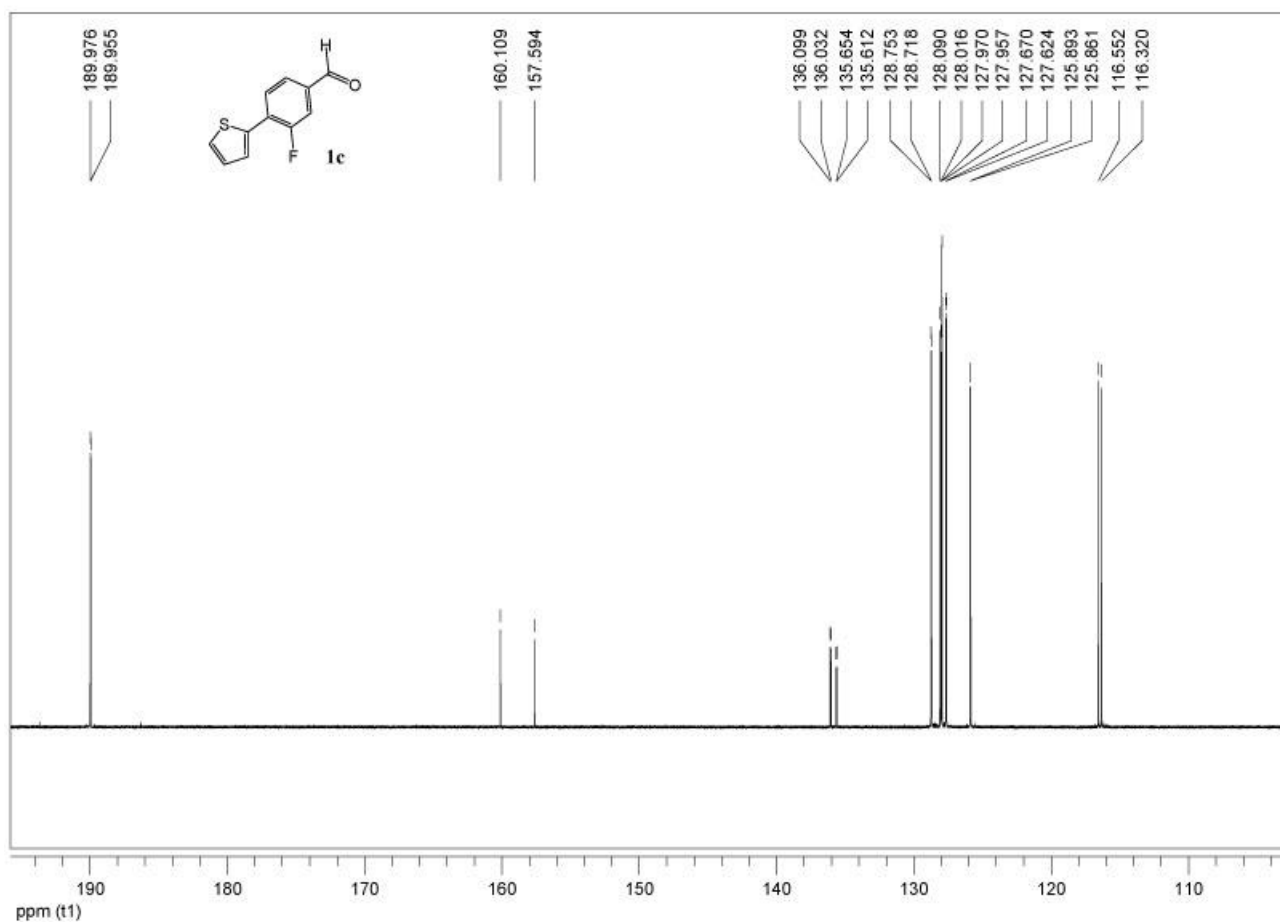

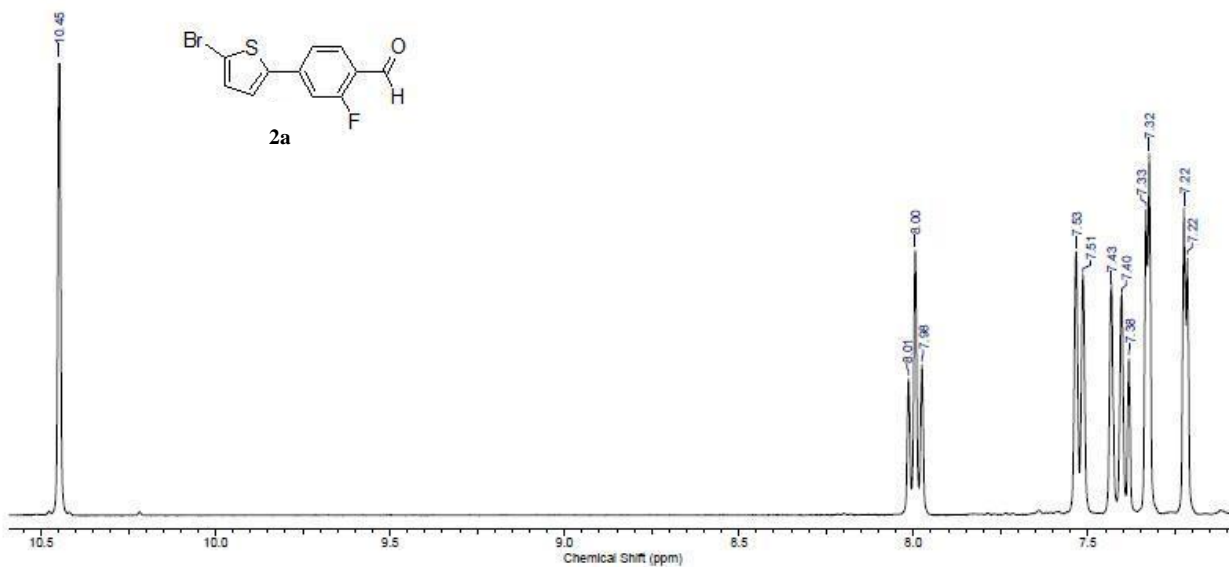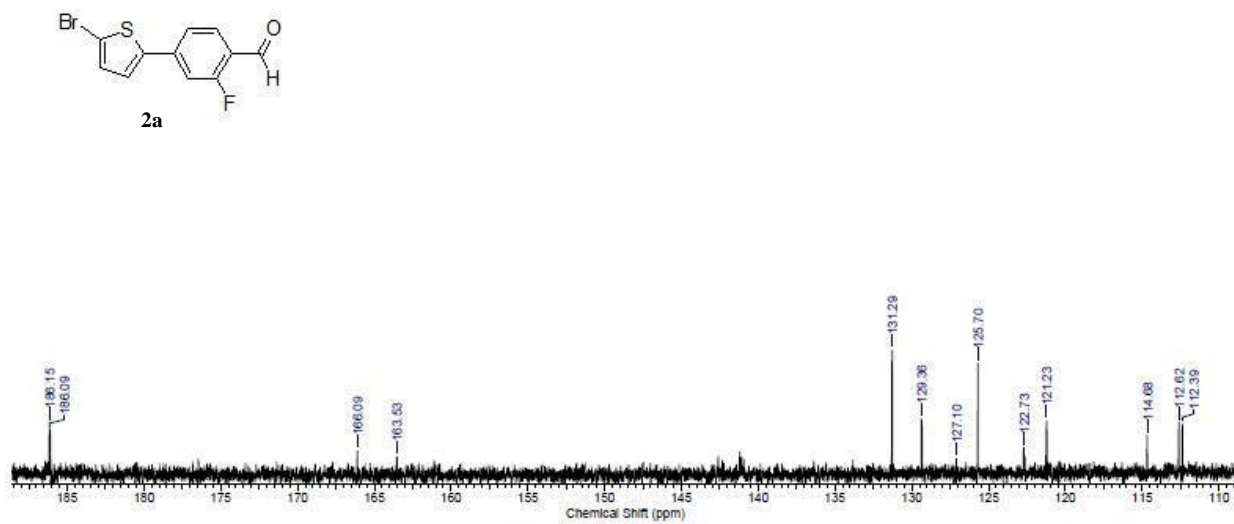

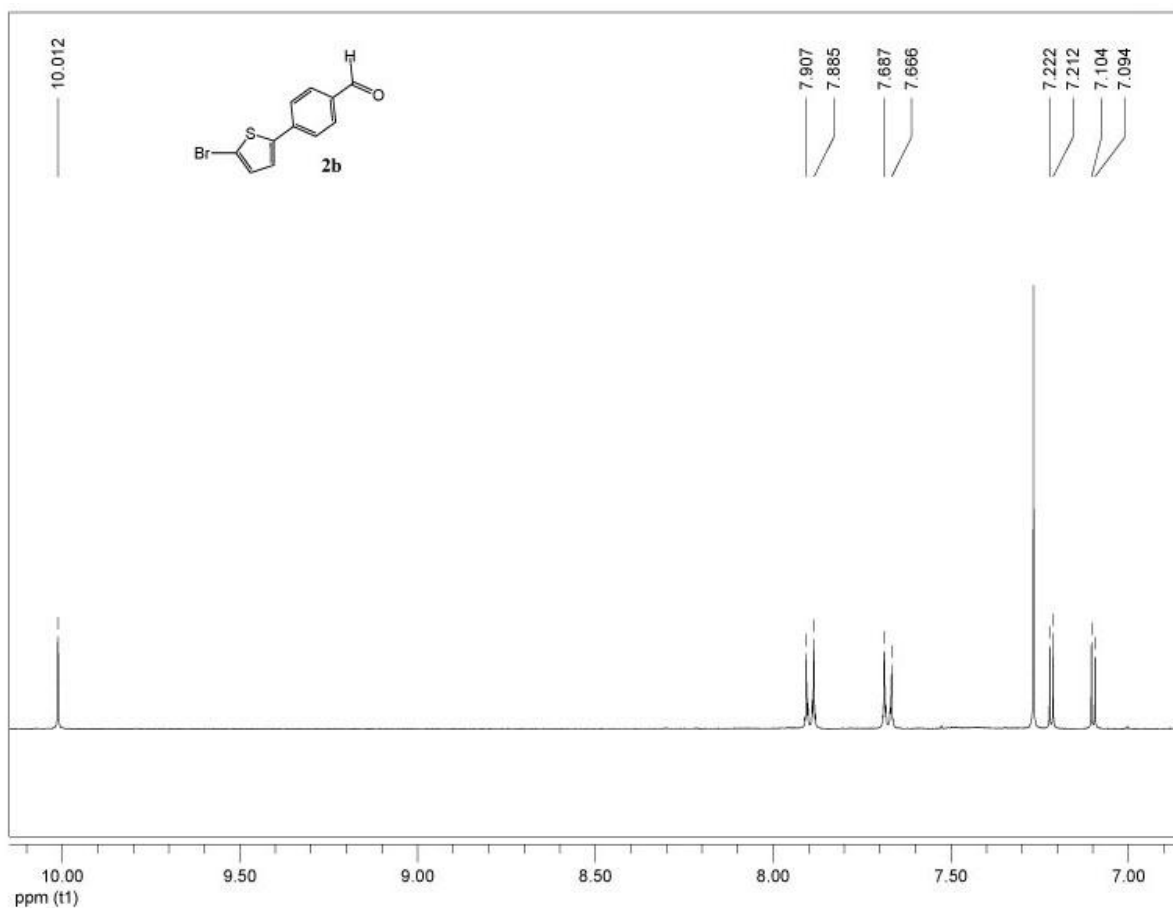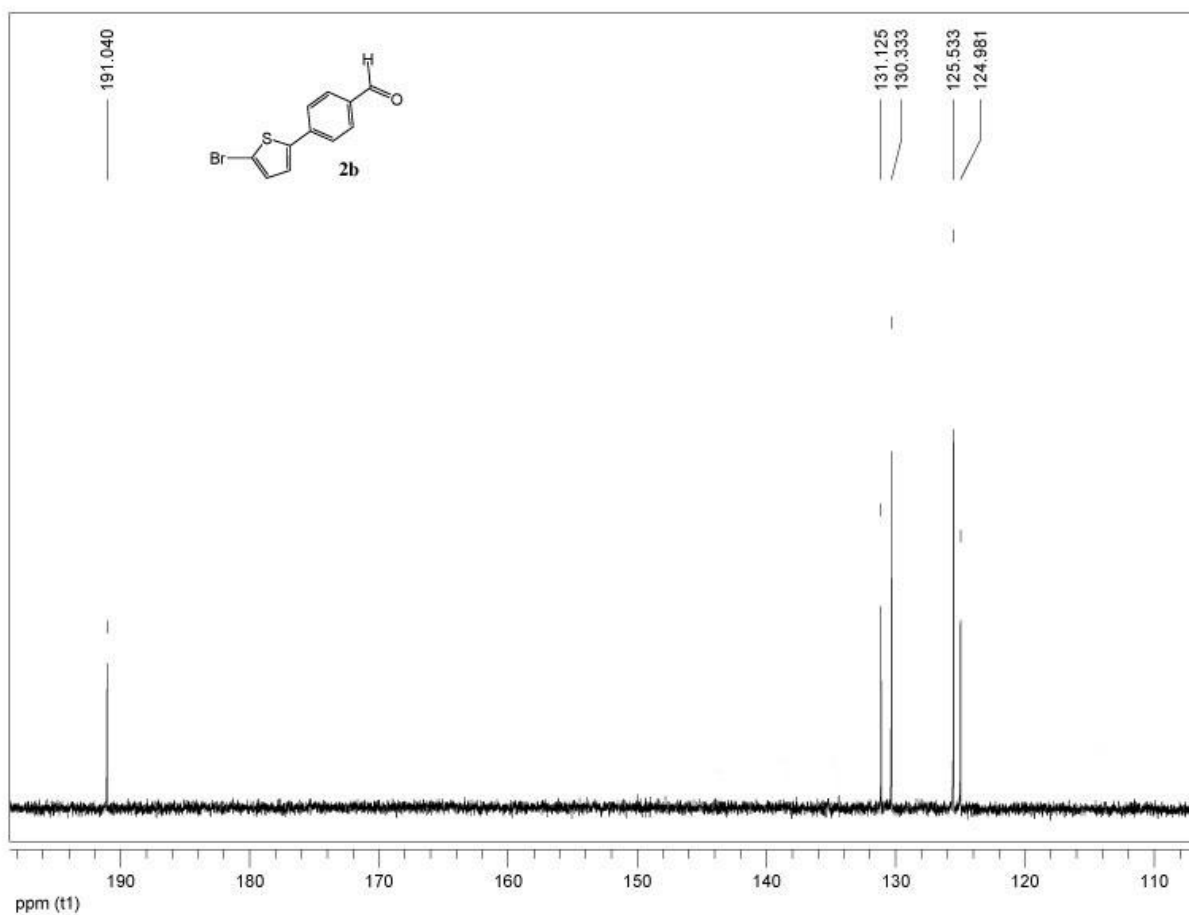



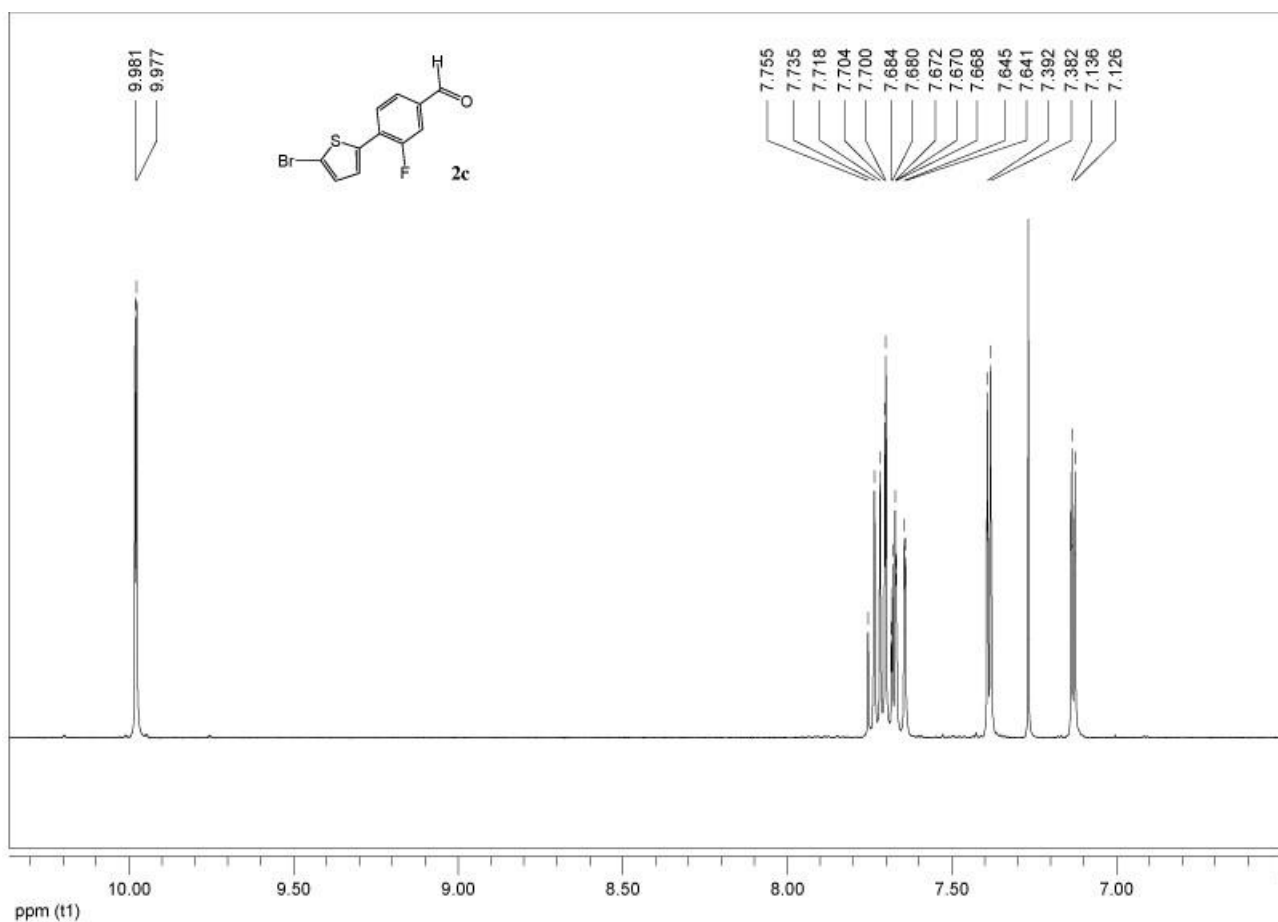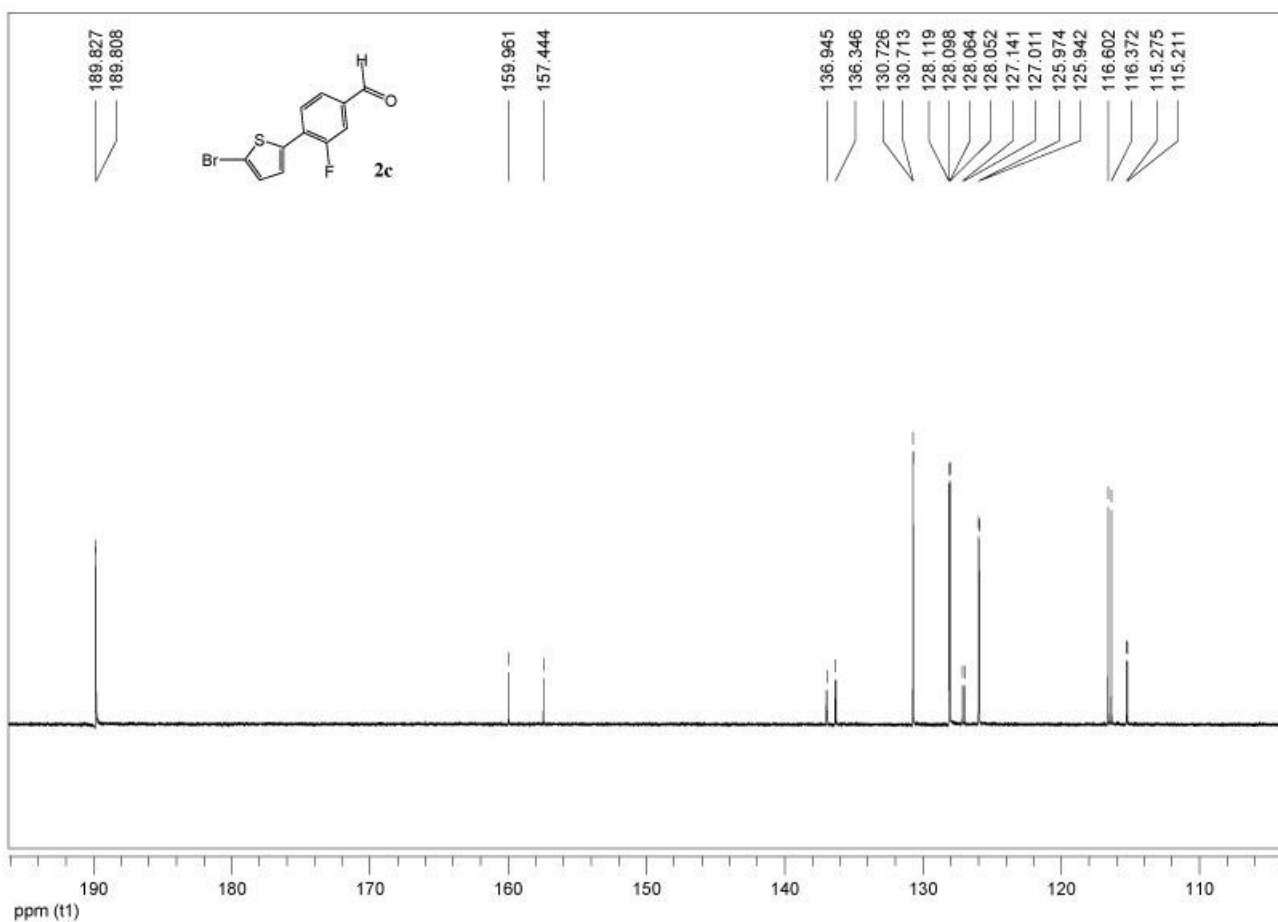

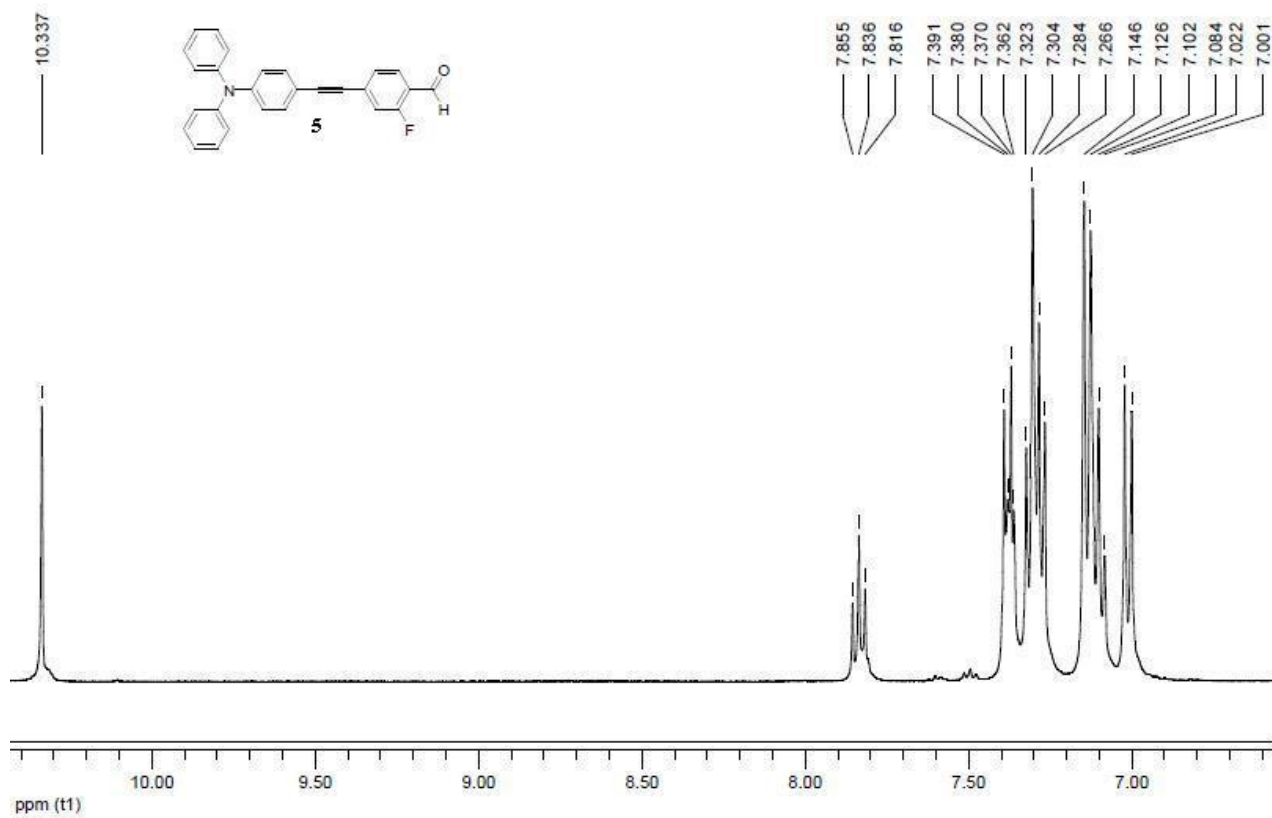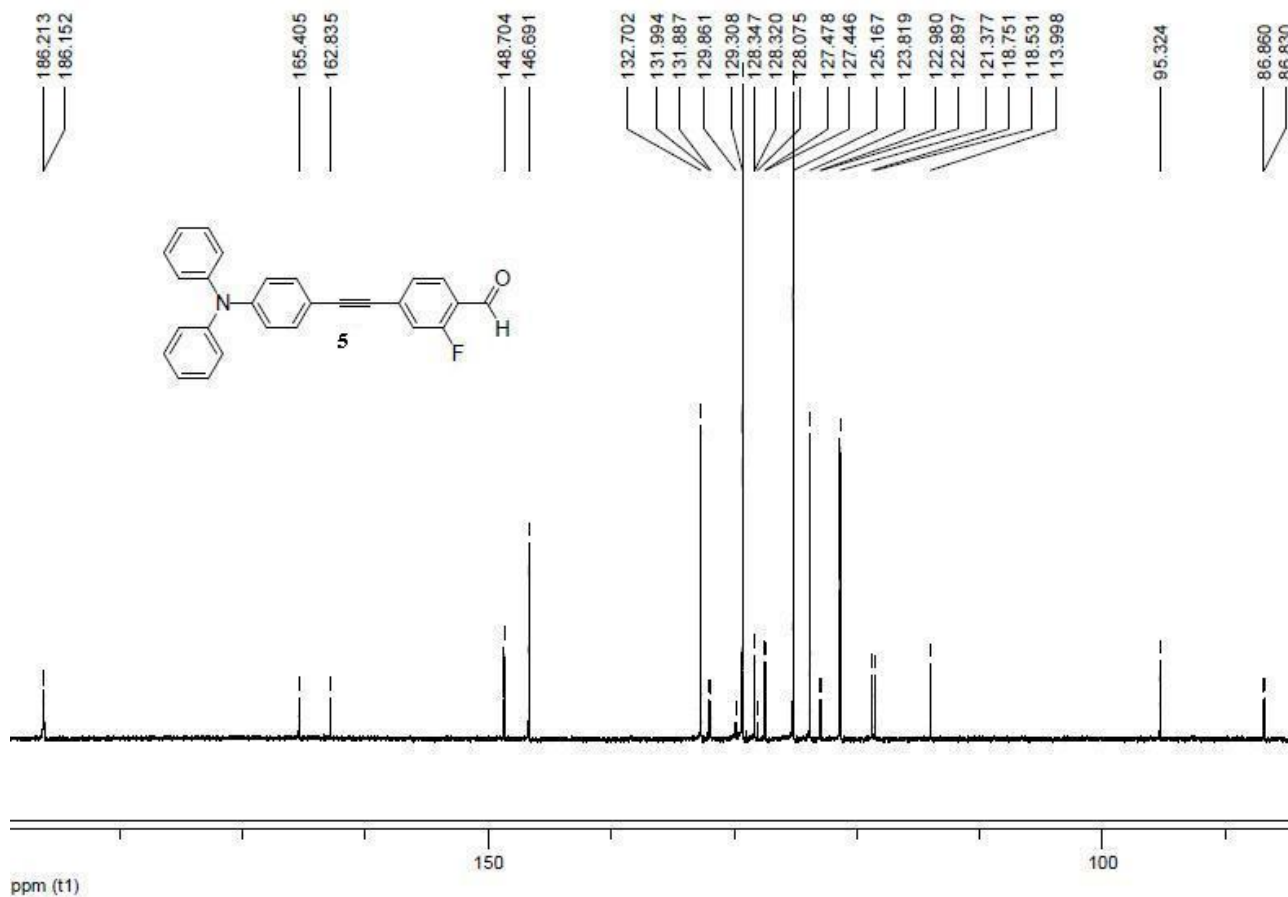

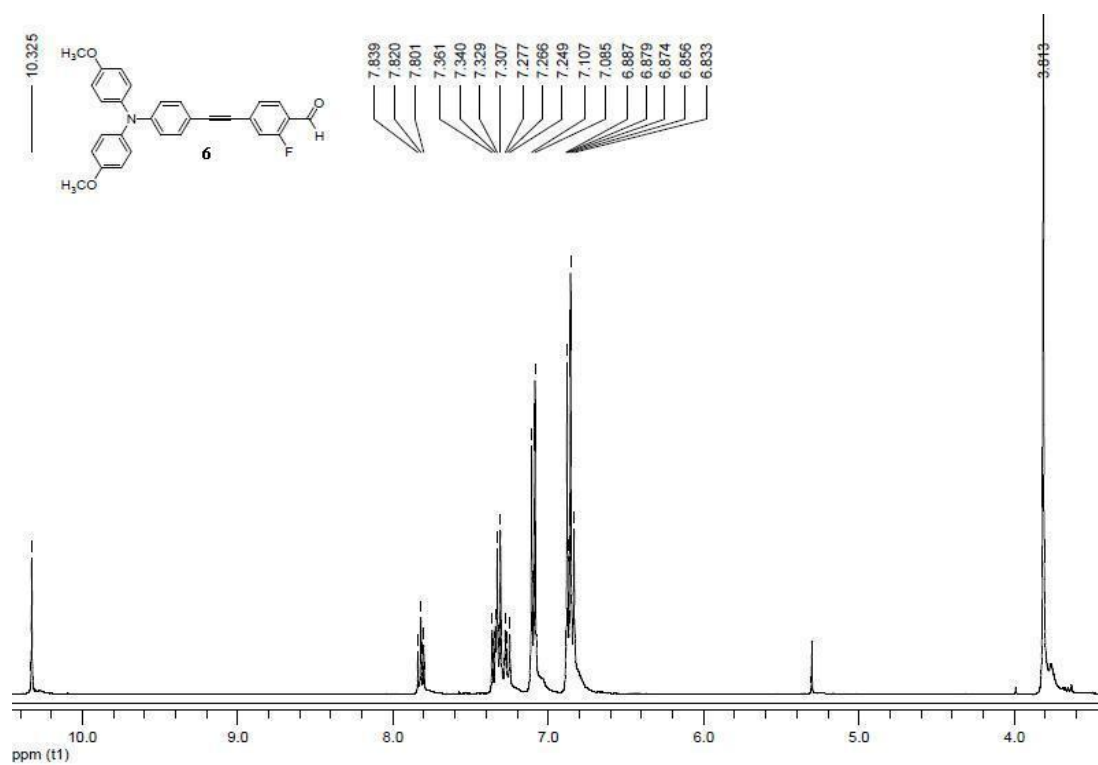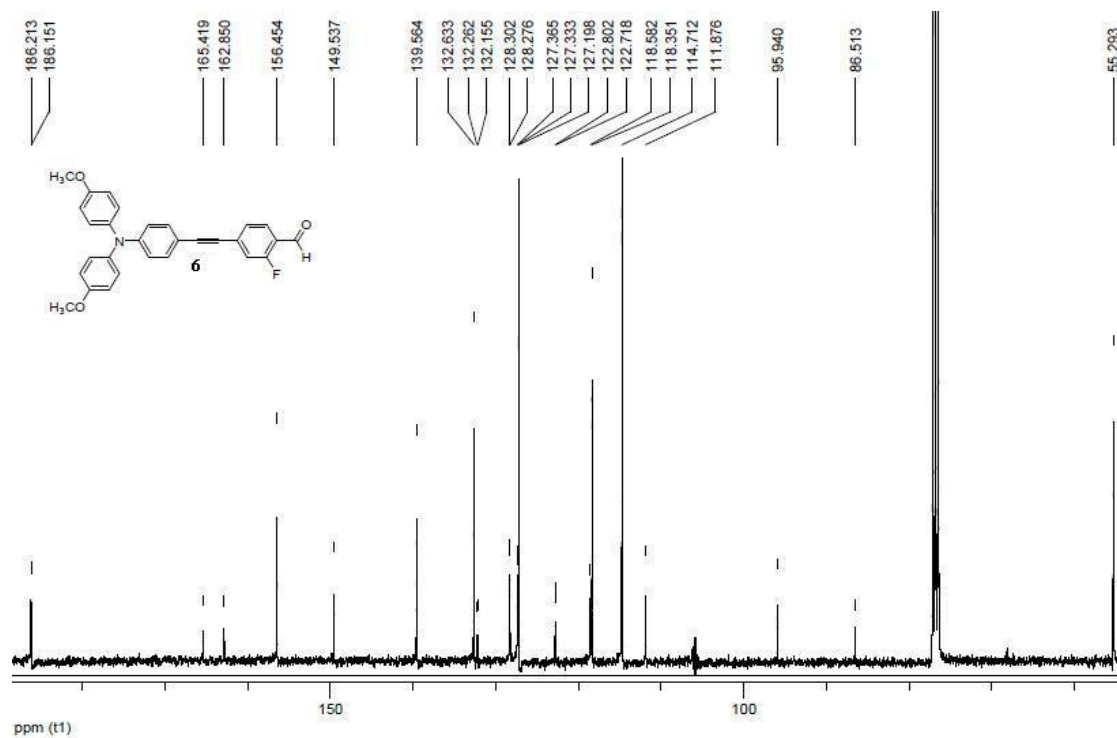

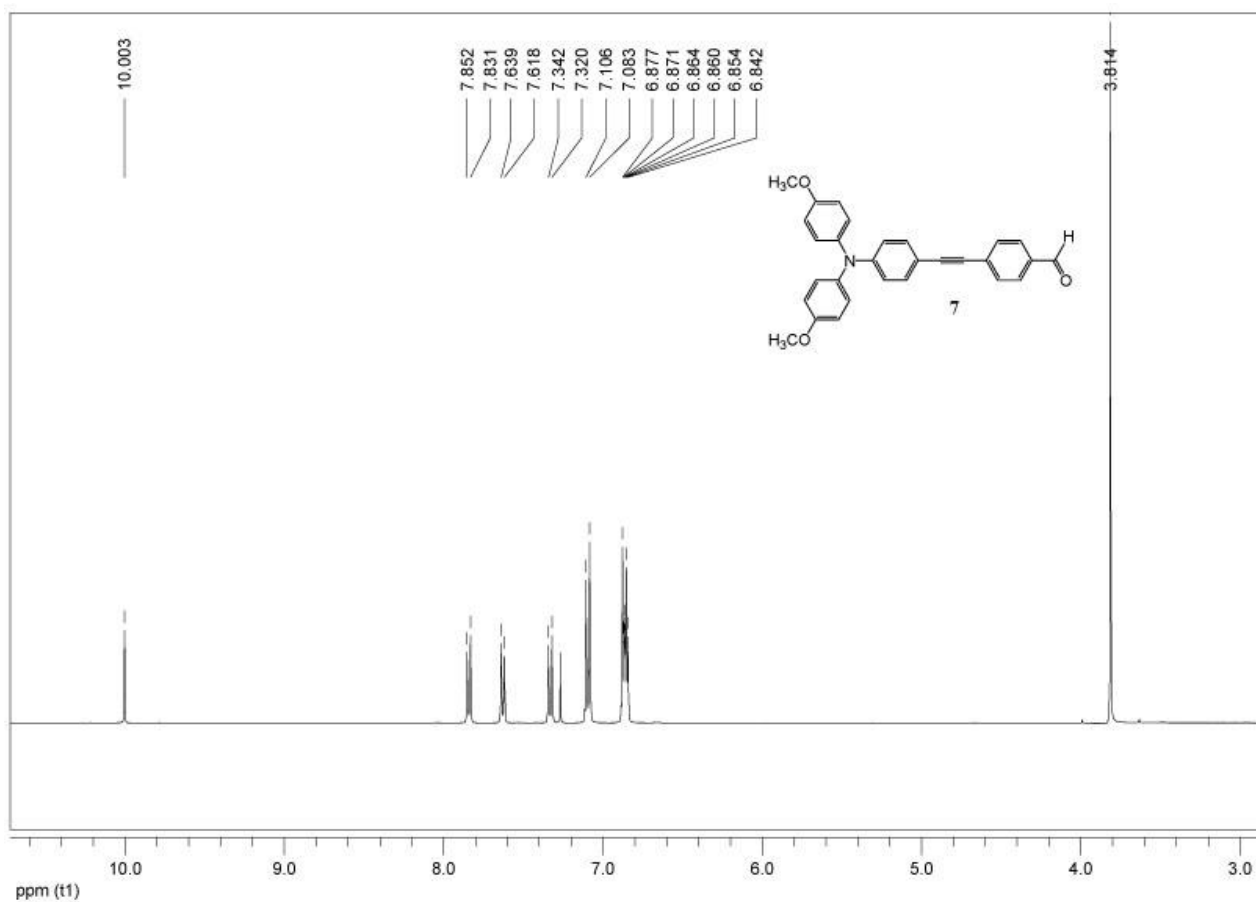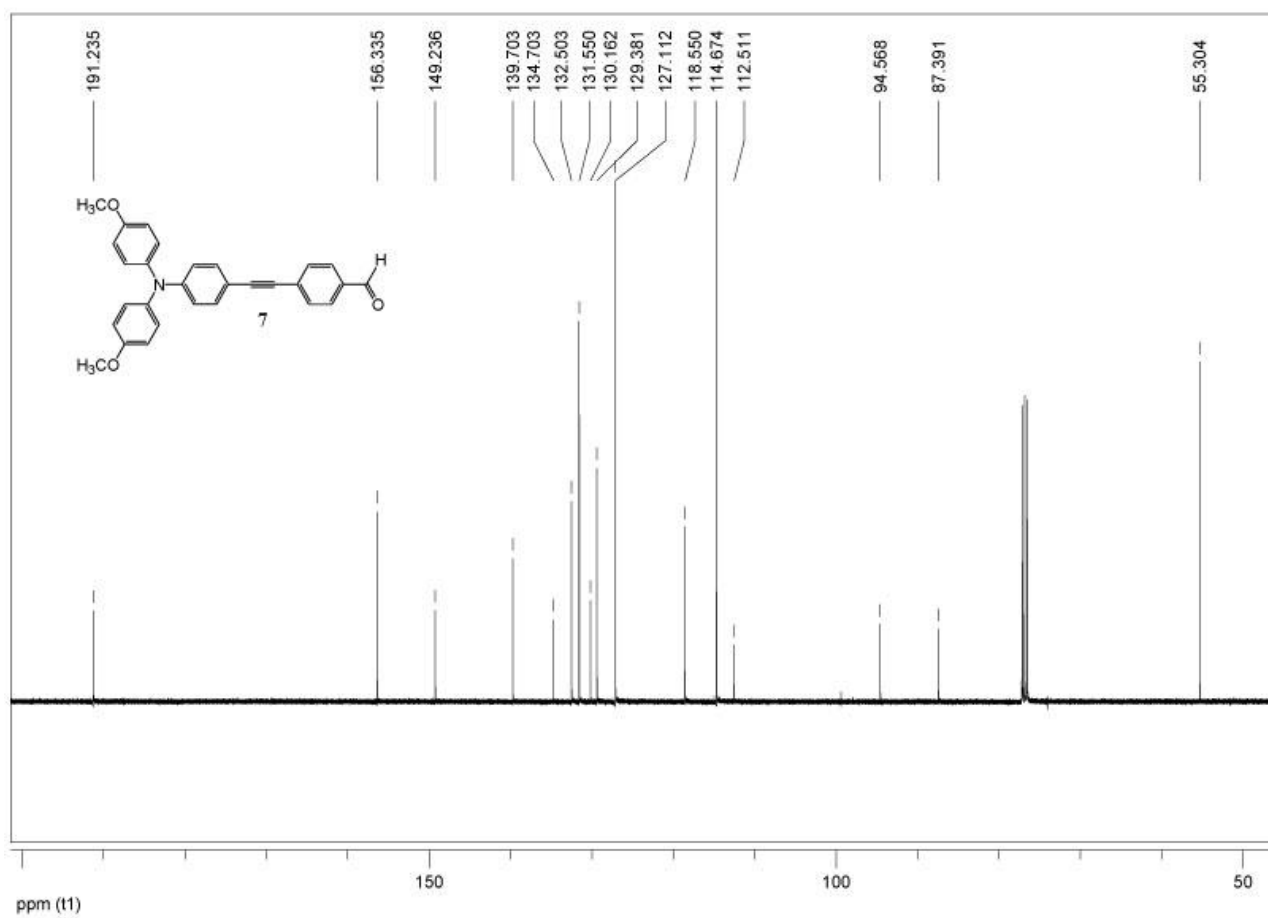

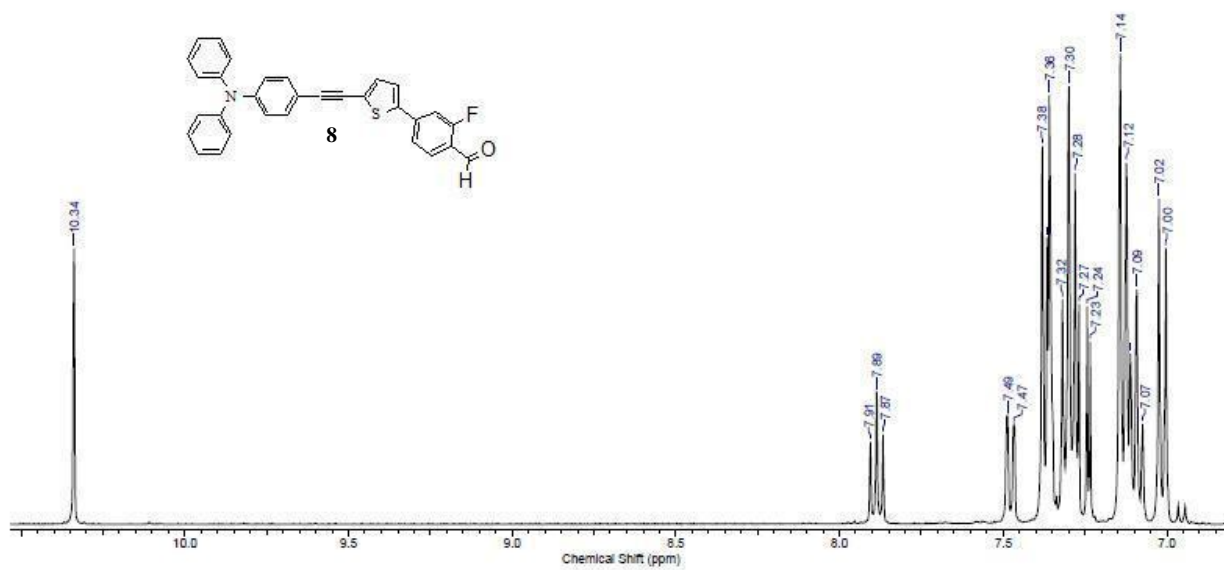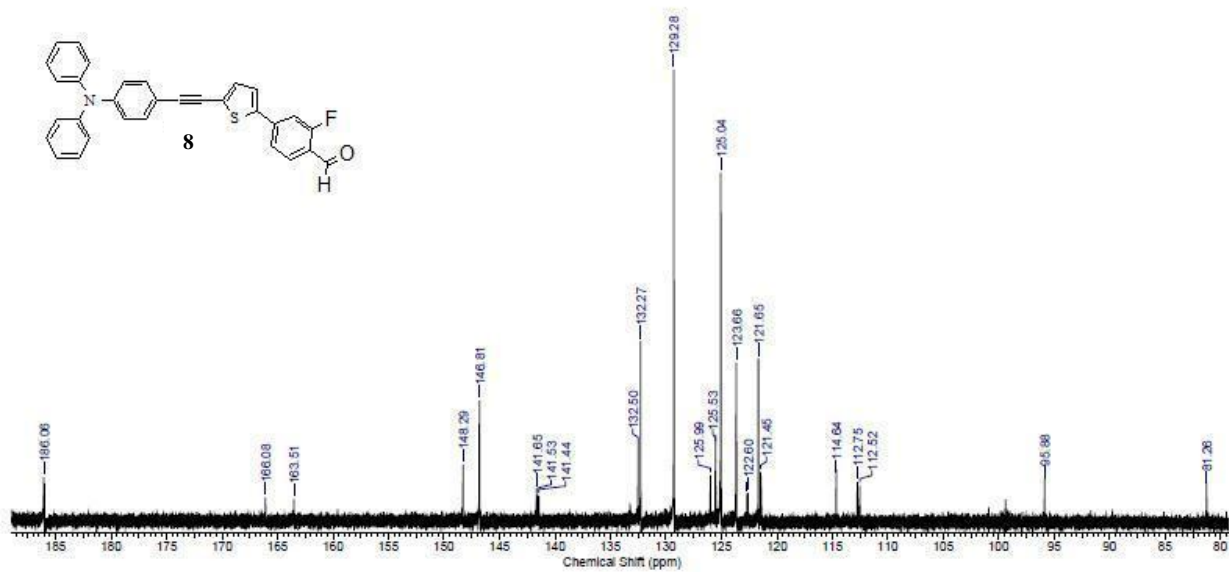

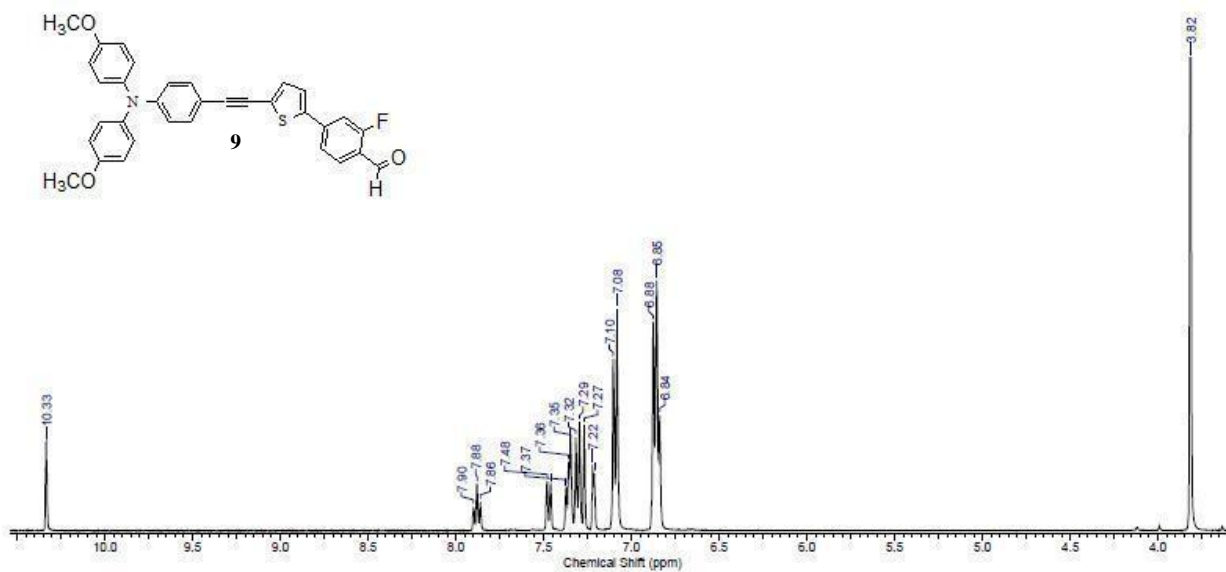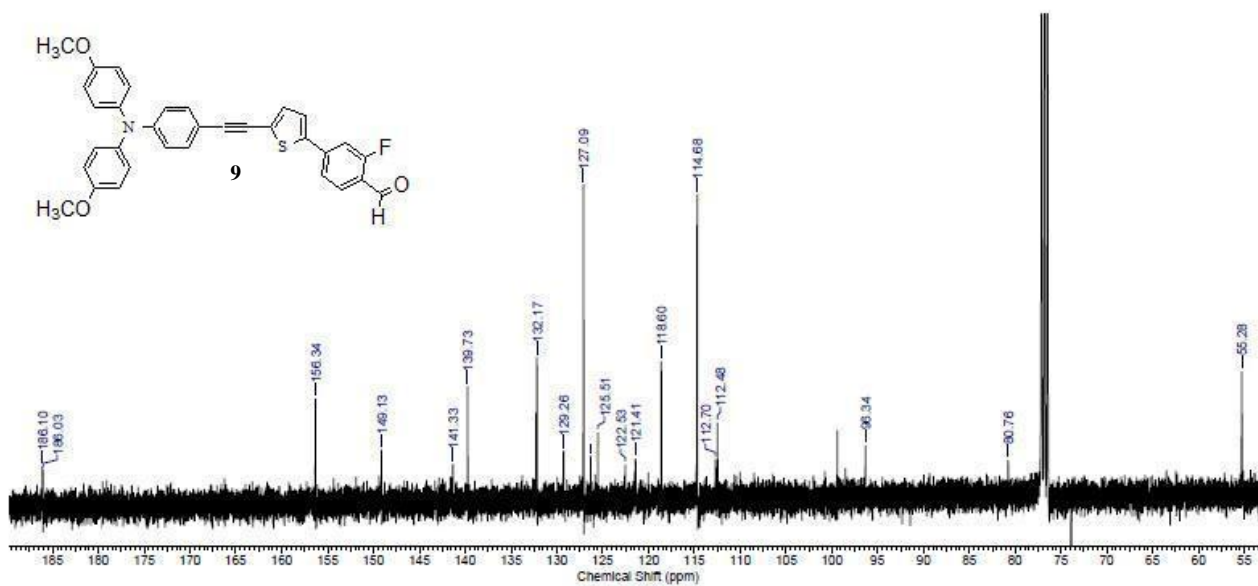

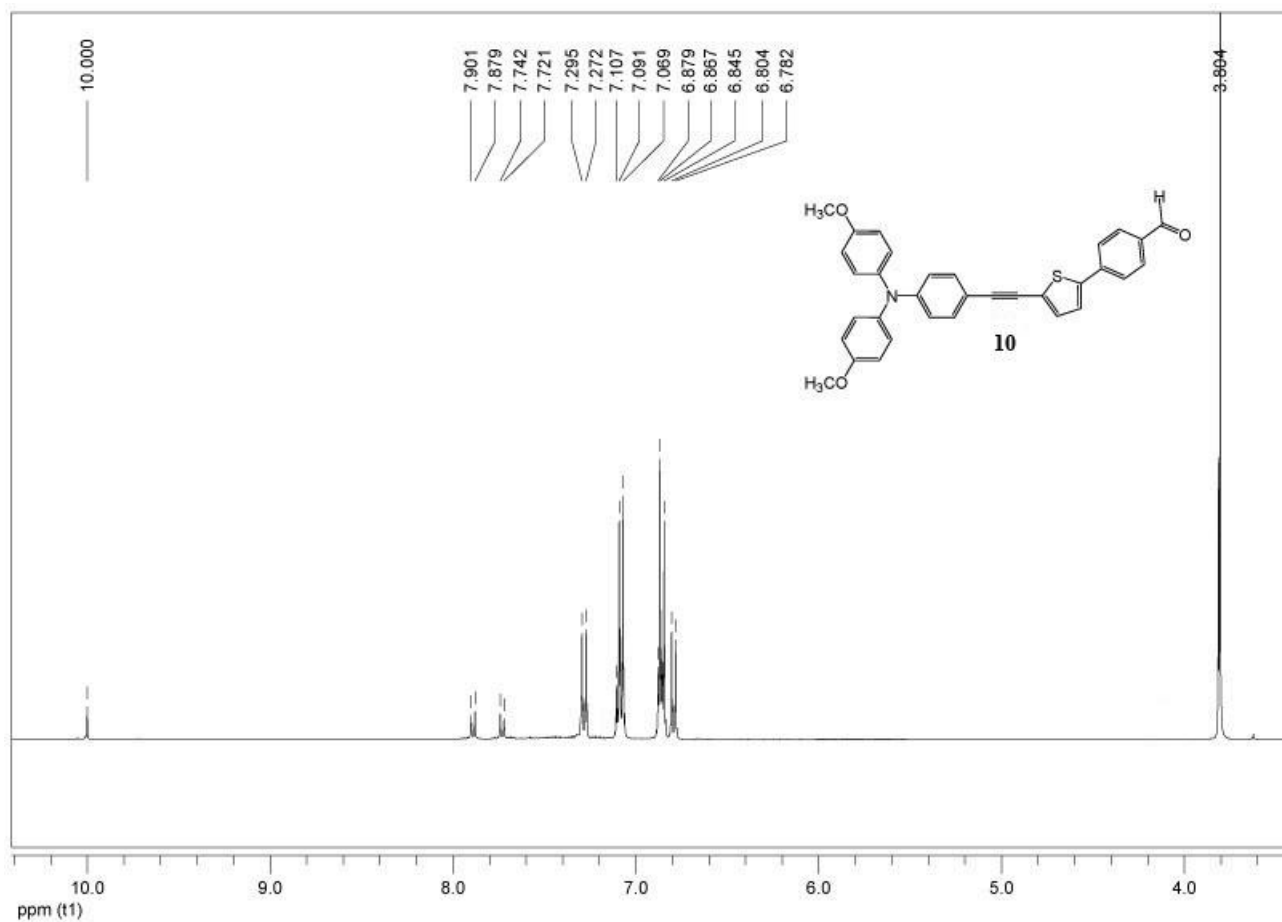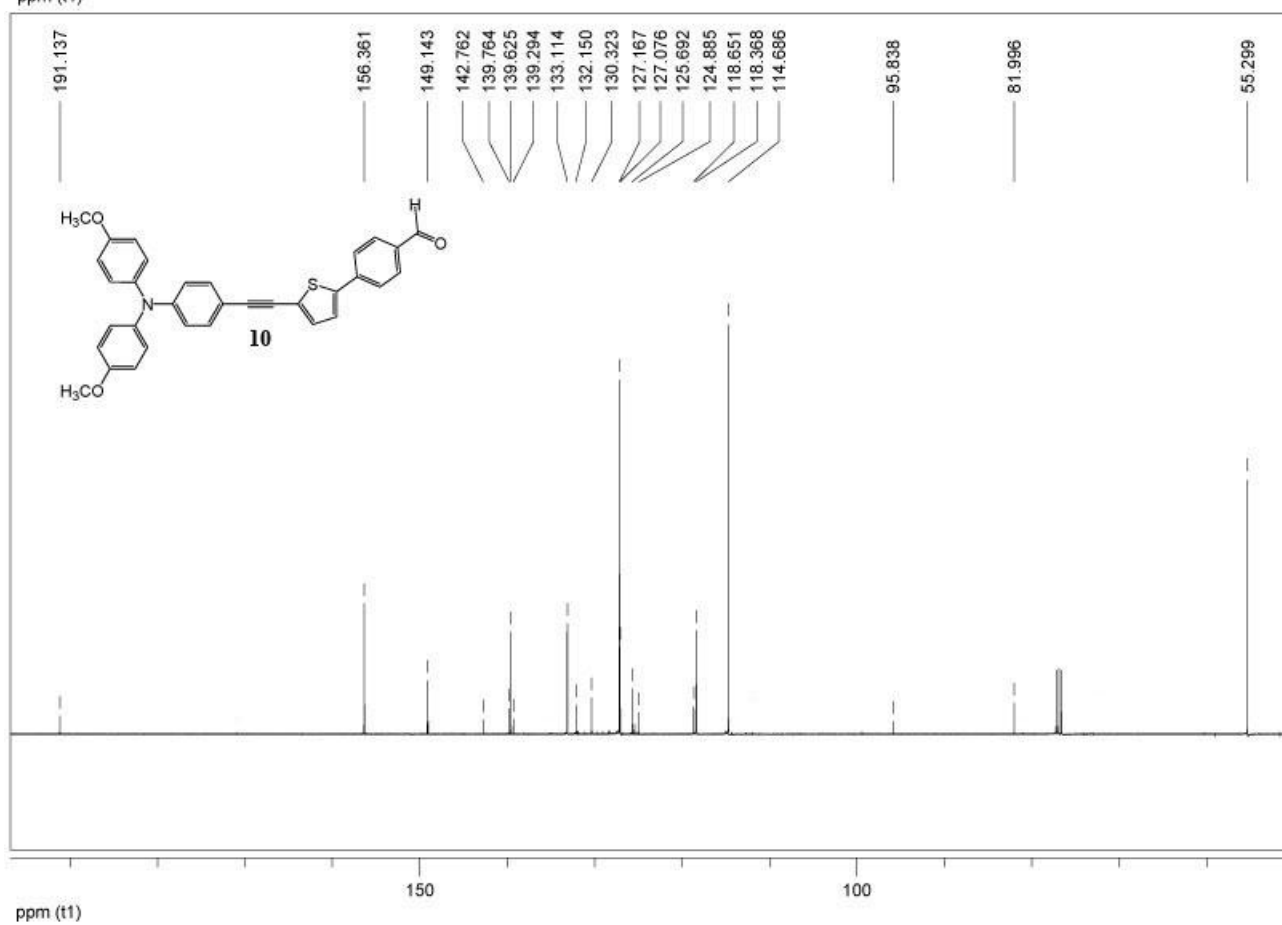

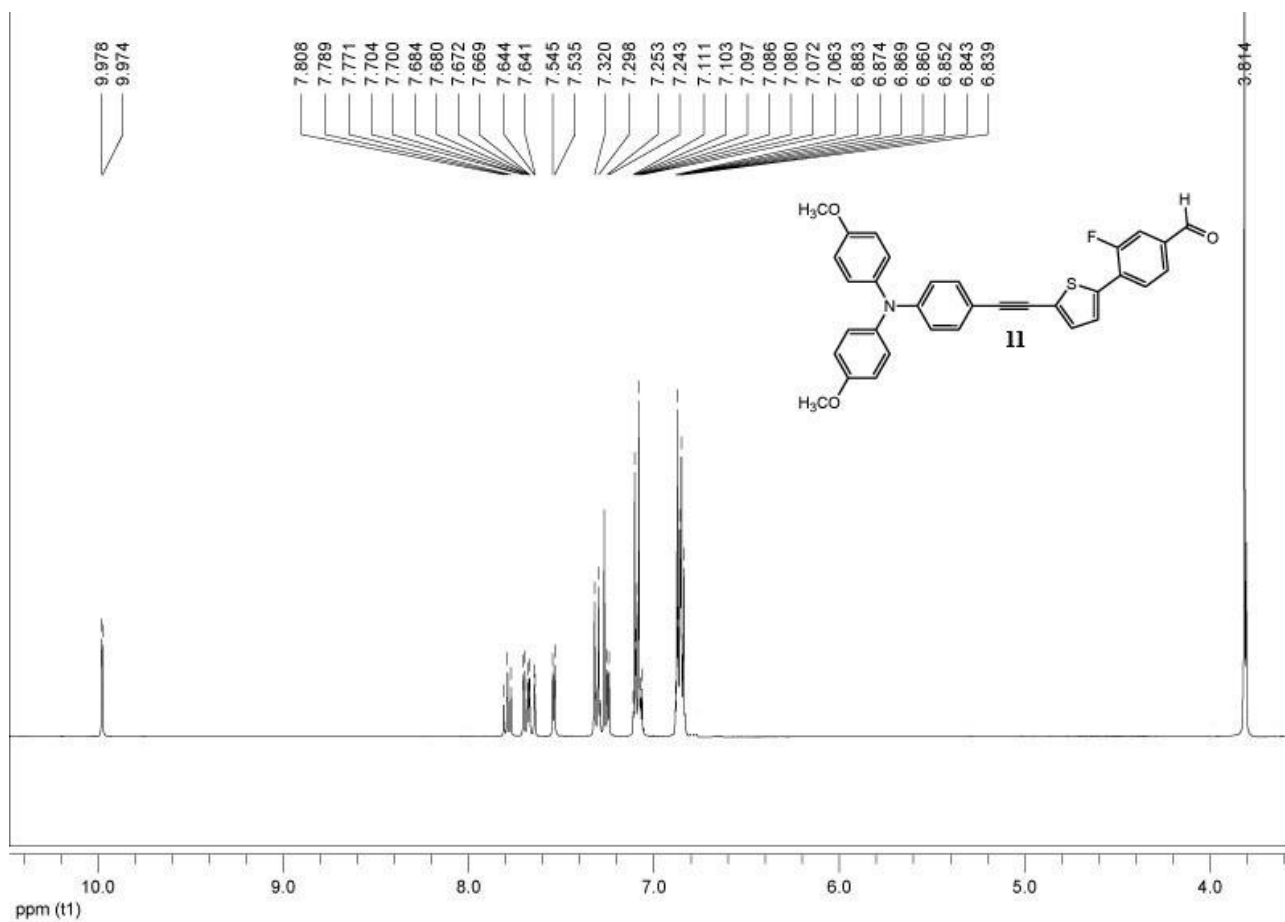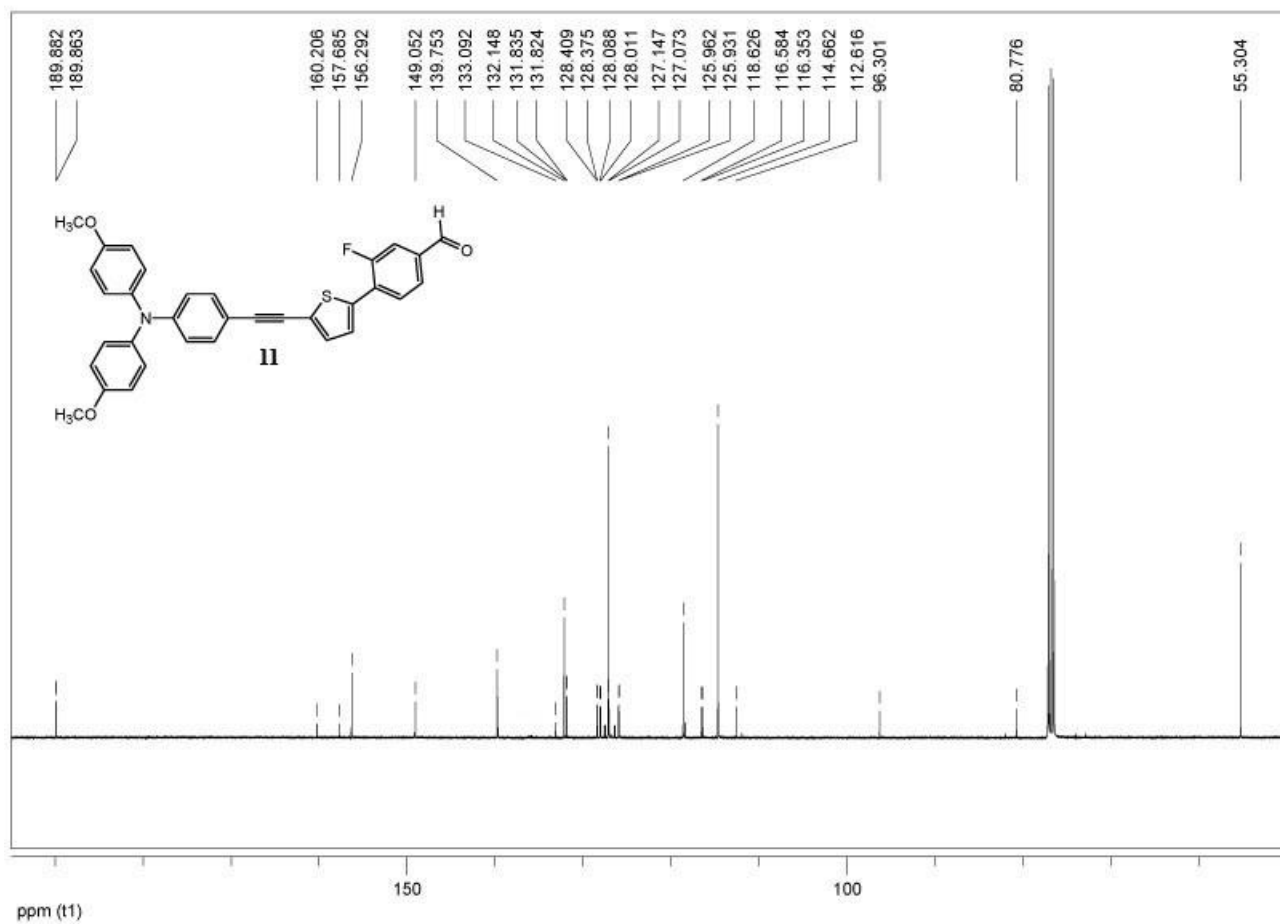



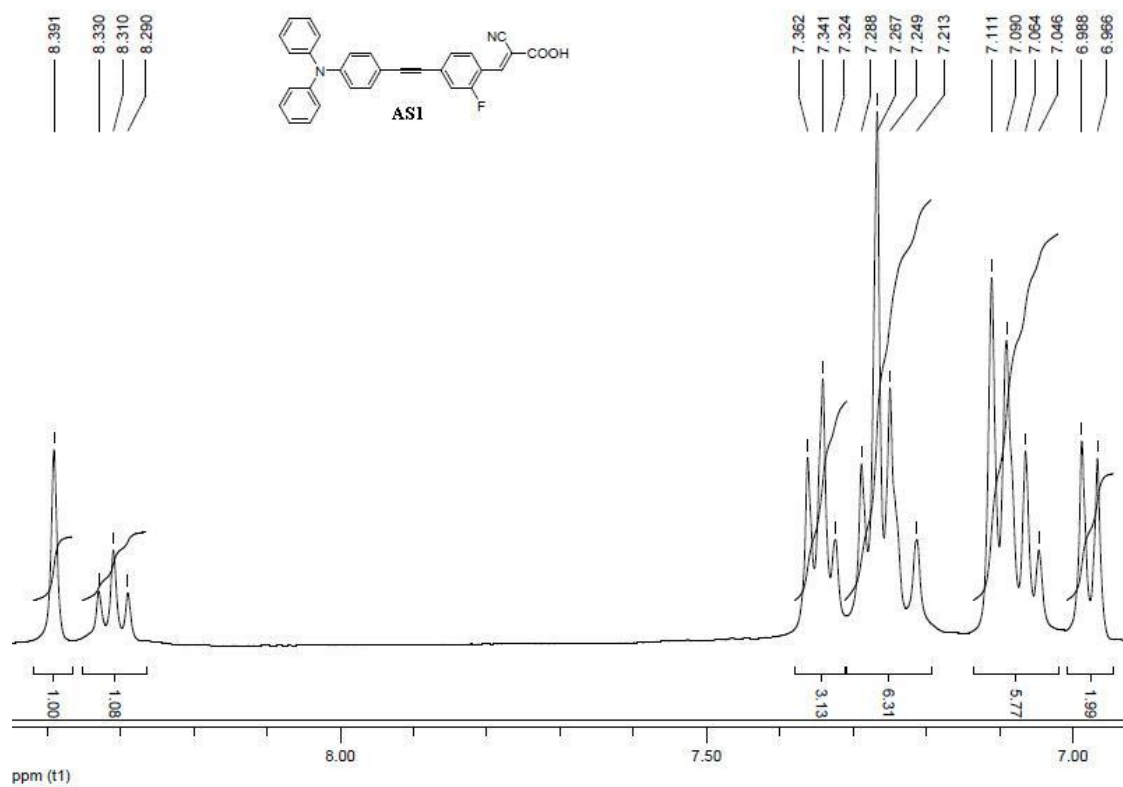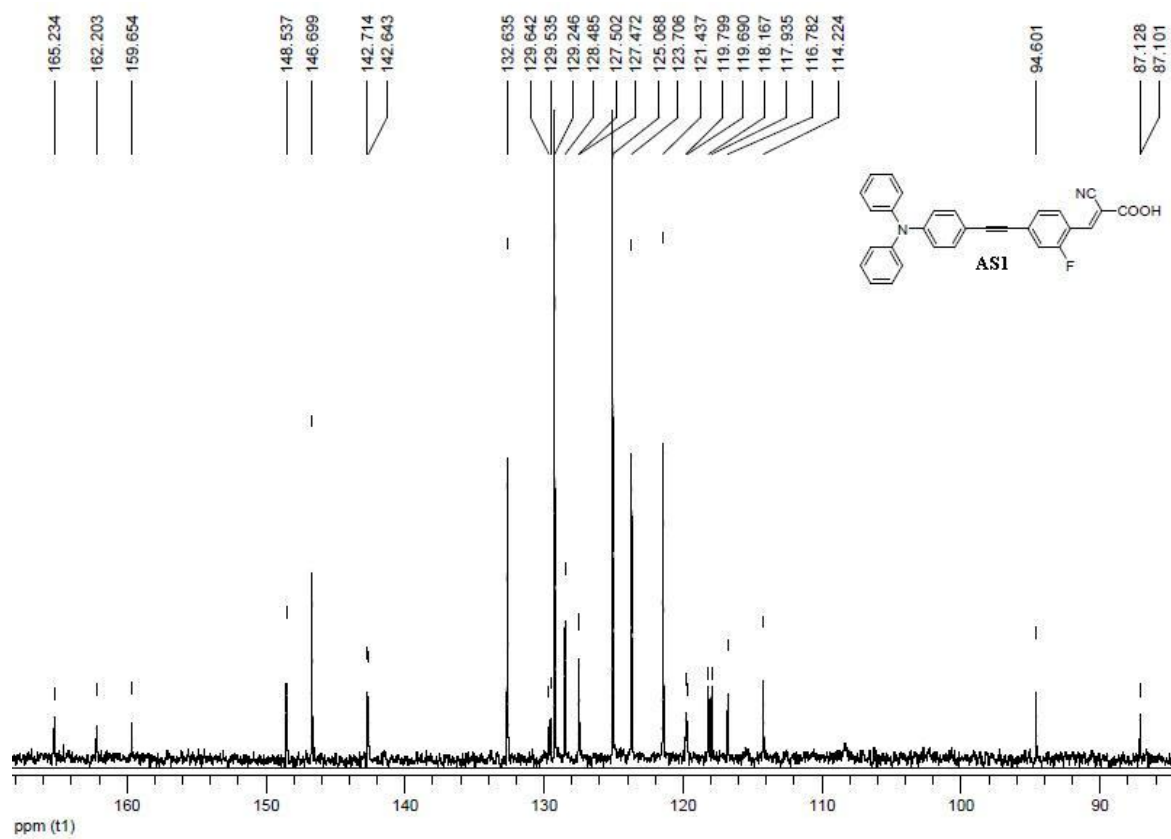

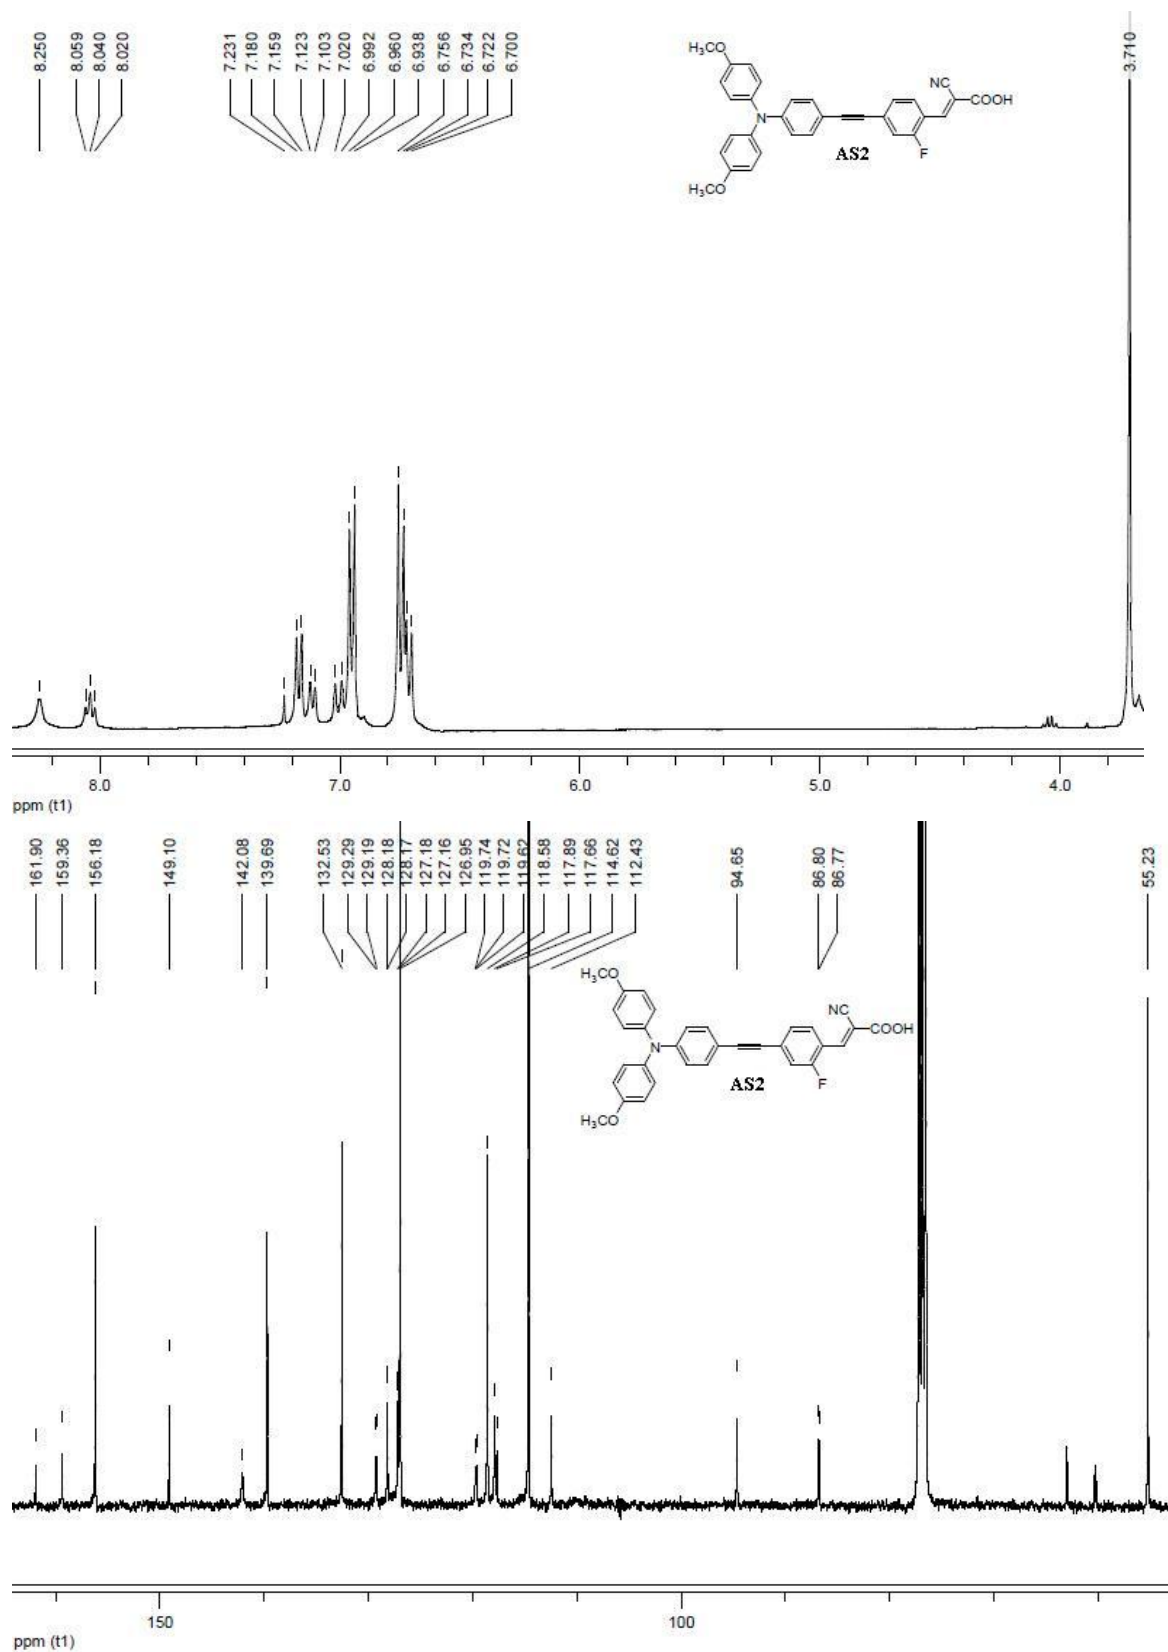

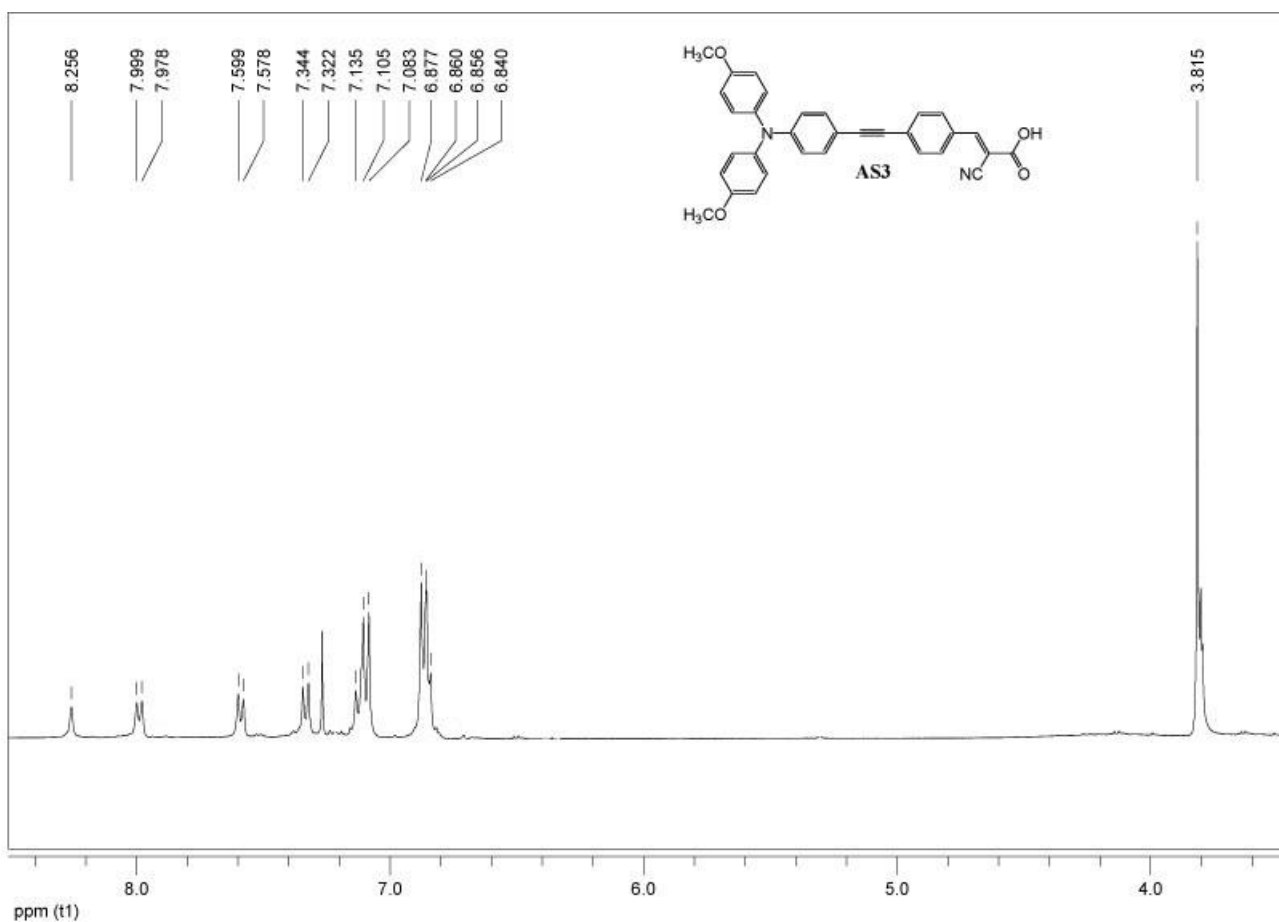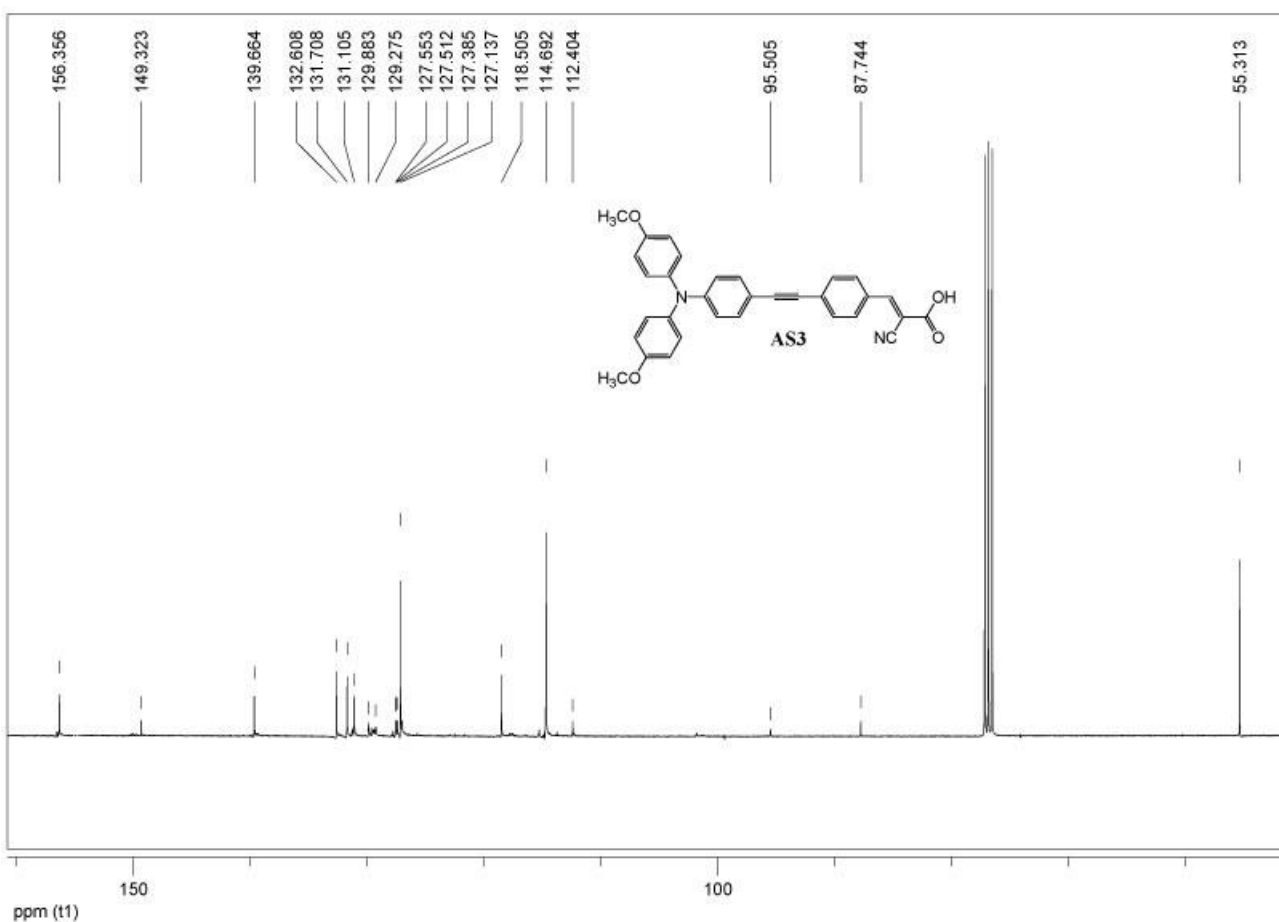

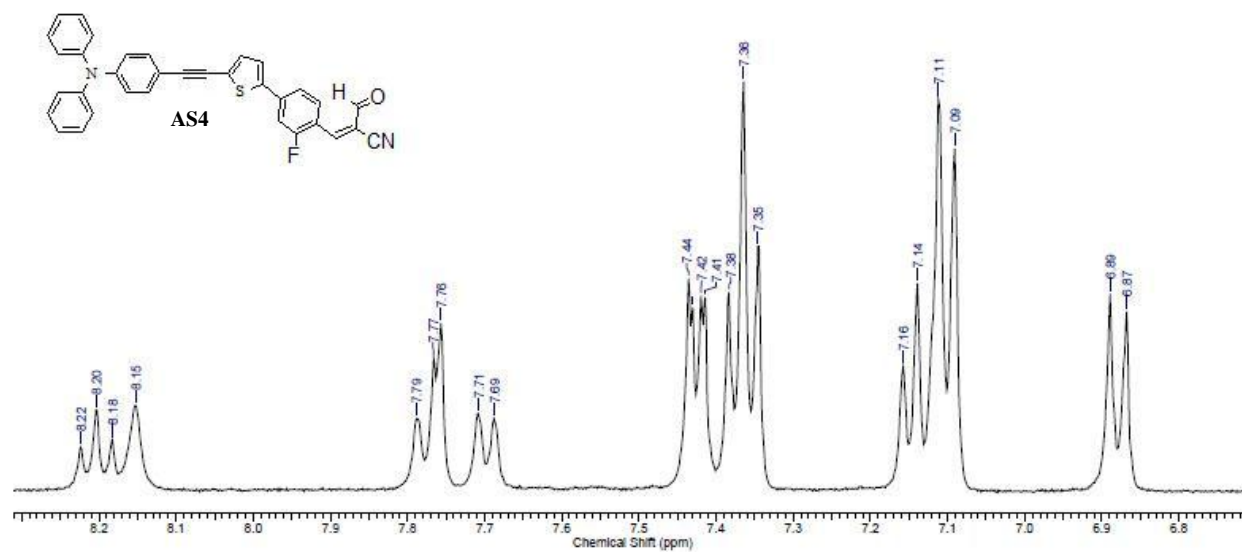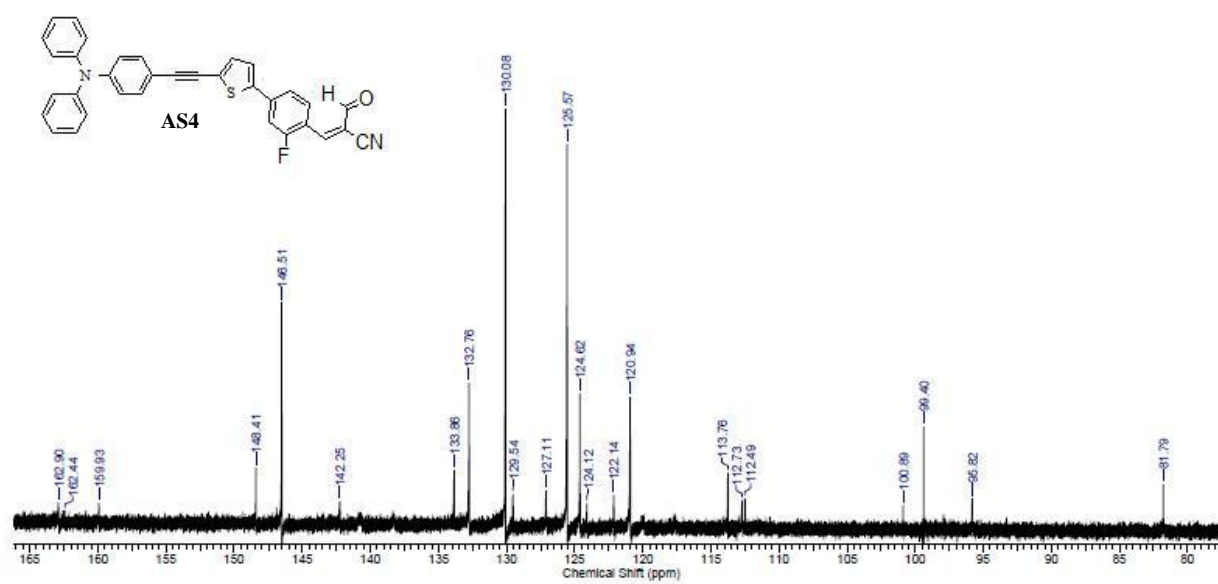

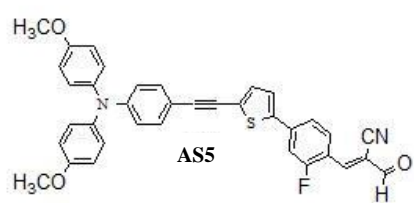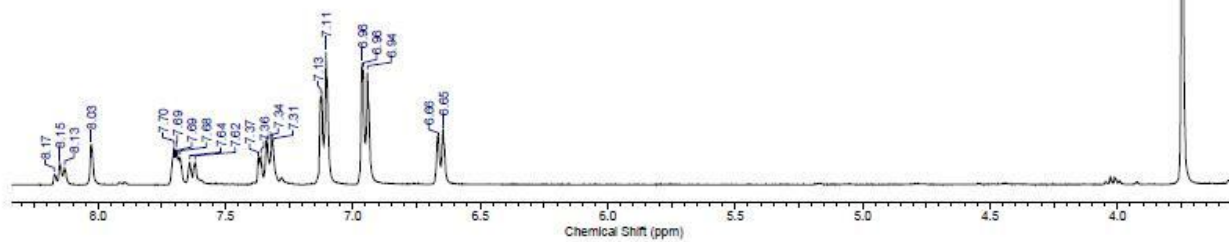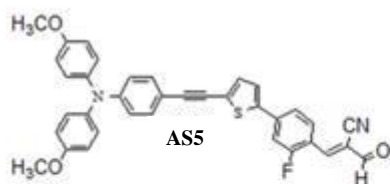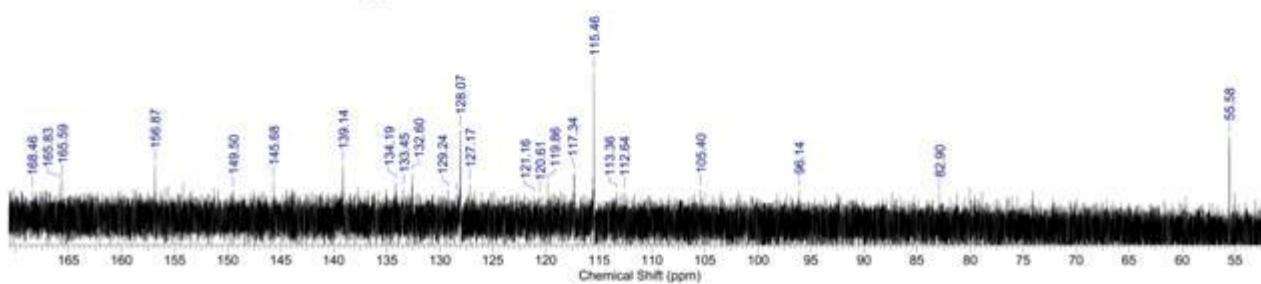

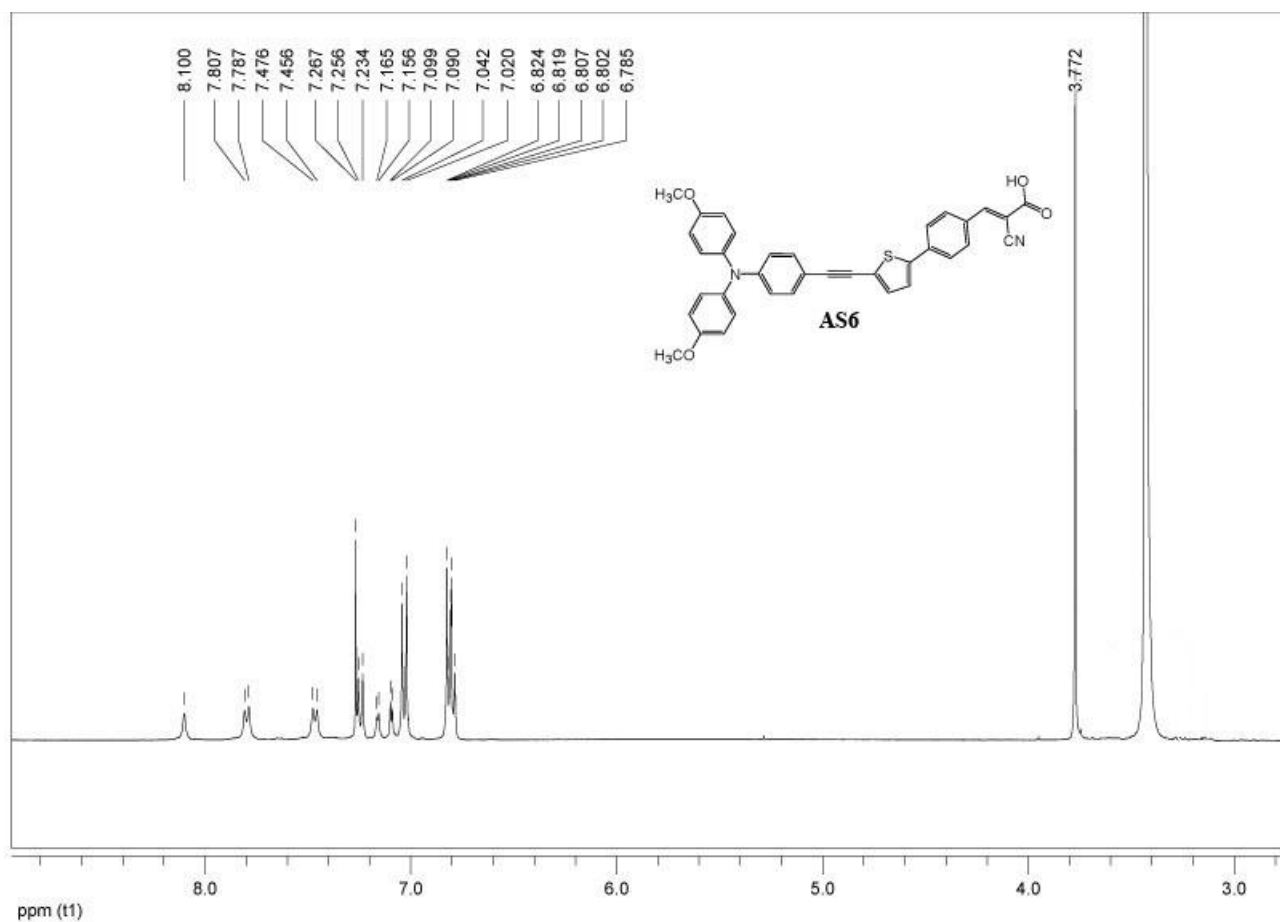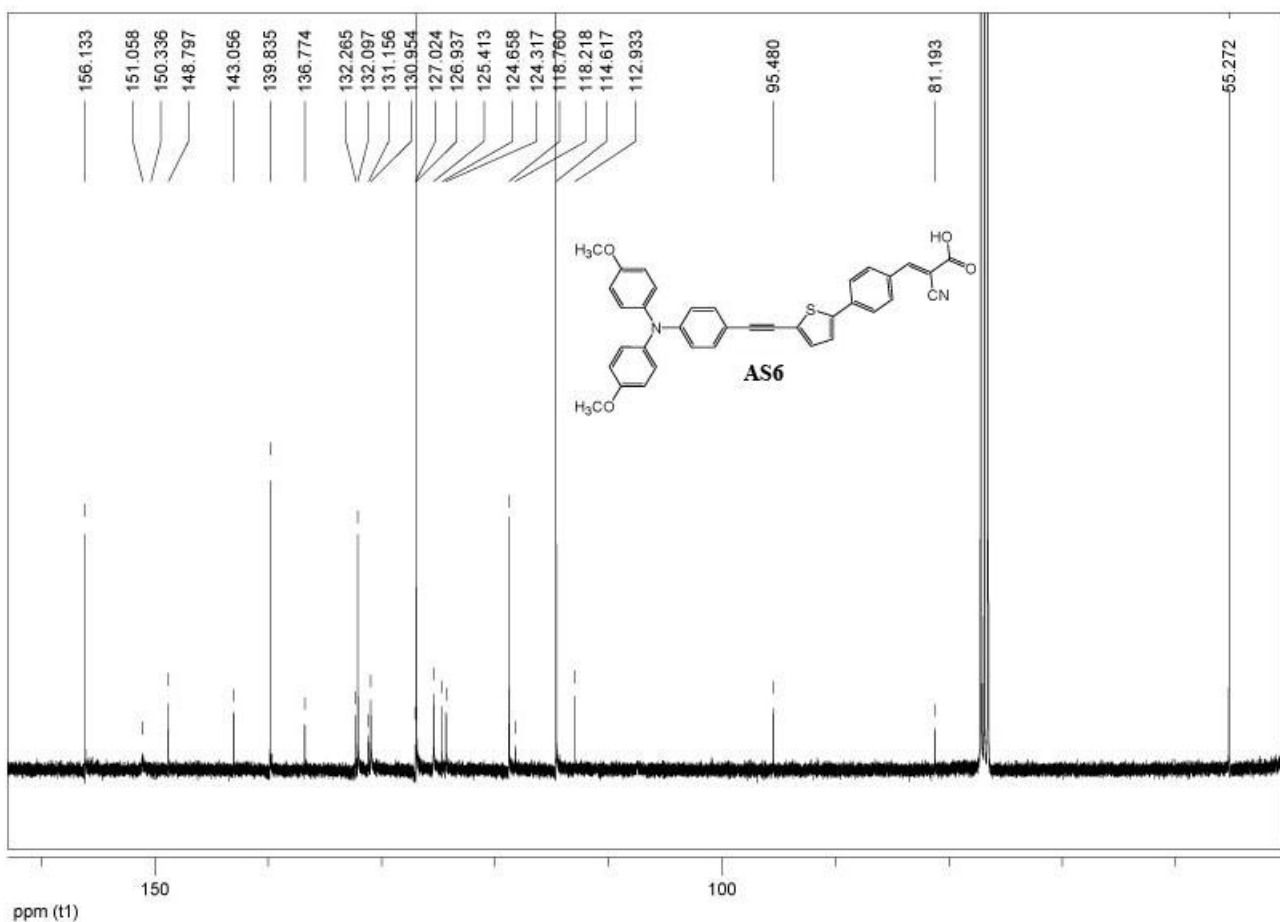

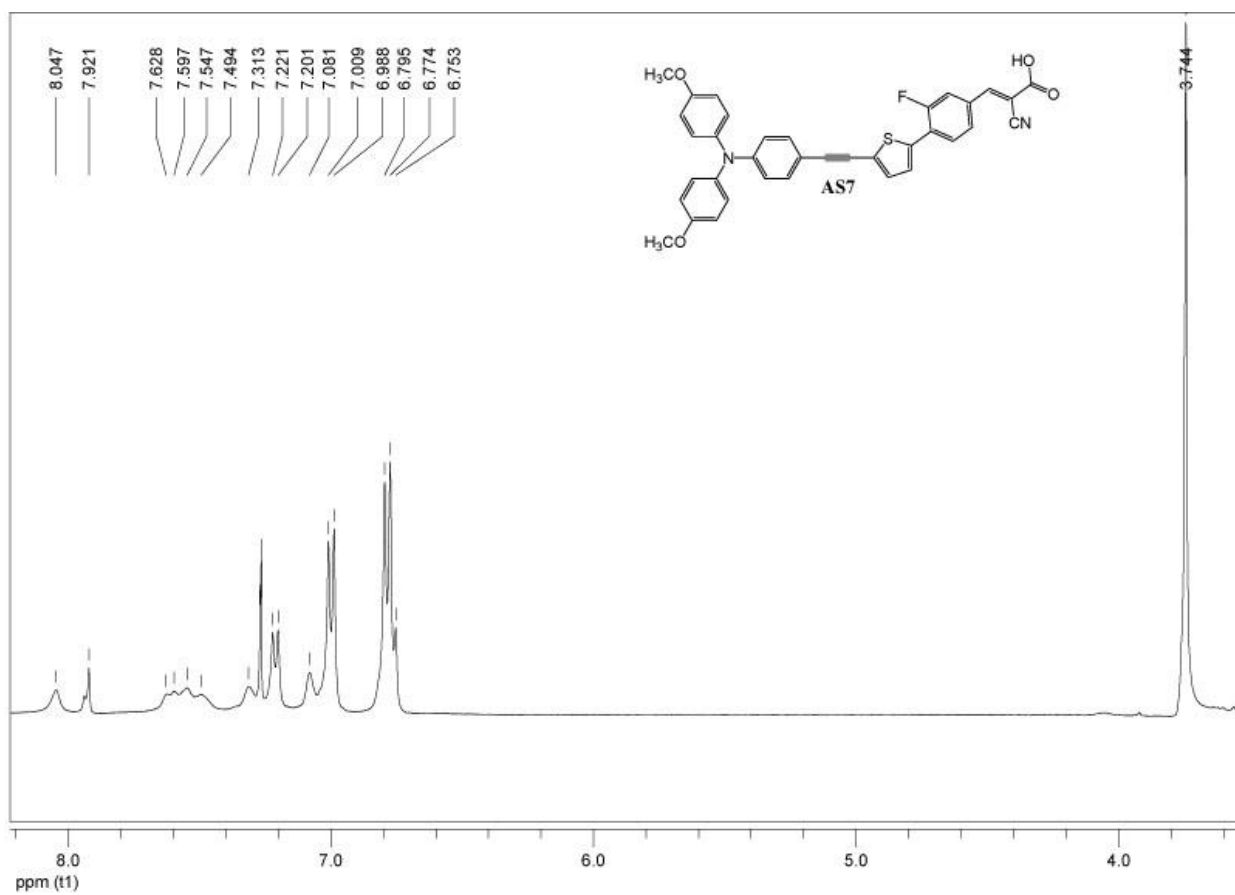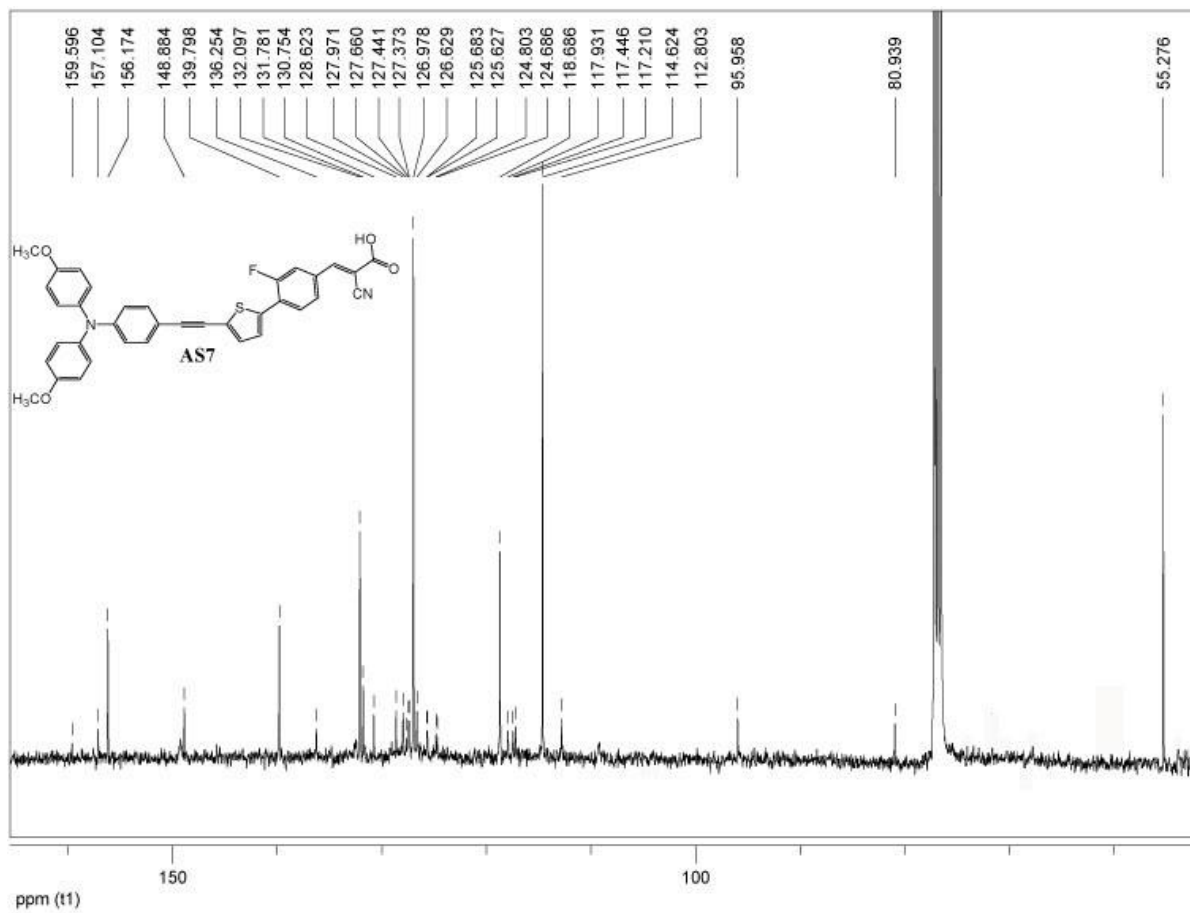

Supplement: c3ta10423k.pdf [file c3ta10423k.pdf]
